# Supplementary material for: Anticancer activity of a cis-dichloridoplatinum(ii) complex of a chelating nitrogen mustard: insight into unusual guanine binding mode and low deactivation by glutathione
Source: Royal Society of Chemistry journal article supplement (doi:10.1039/c5dt04459f), 2016-01-01
Supplement: c5dt04459f1.pdf [file c5dt04459f1.pdf]

# Anticancer activity of a *cis*-dichloridoplatinum(II) complex of a chelating nitrogen mustard: Insight to unusual guanine binding mode and low deactivation by glutathione

*Subhendu Karmakar, Kallol Purkait, Saptarshi Chatterjee and Arindam Mukherjee\*†*

†Department of Chemical Sciences Indian Institute of Science Education and Research  
Kolkata, Mohanpur Campus, Nadia-741246, West Bengal, India.

\*Corresponding author. Fax: (+91)033-25873118; Tel: (+91)033-25873121; E-mail:

[a.mukherjee@iiserkol.ac.in](mailto:a.mukherjee@iiserkol.ac.in)

## Contents

|                                                                                                                                                                                                                                                                                                                                                                                                                                                                                                                                                                                                                                                       |    |
|-------------------------------------------------------------------------------------------------------------------------------------------------------------------------------------------------------------------------------------------------------------------------------------------------------------------------------------------------------------------------------------------------------------------------------------------------------------------------------------------------------------------------------------------------------------------------------------------------------------------------------------------------------|----|
| <b>Table S1</b> Crystal Data, data Collection and refinement parameters for complex <b>2</b> .....                                                                                                                                                                                                                                                                                                                                                                                                                                                                                                                                                    | 6  |
| <b>Fig. S1</b> $^1\text{H}$ NMR of L1 in $\text{D}_2\text{O}$ , 400 MHz. ....                                                                                                                                                                                                                                                                                                                                                                                                                                                                                                                                                                         | 7  |
| <b>Fig. S2</b> $^{13}\text{C}$ NMR of L1 in $\text{D}_2\text{O}$ , 125 MHz. ....                                                                                                                                                                                                                                                                                                                                                                                                                                                                                                                                                                      | 7  |
| <b>Fig. S3</b> $^1\text{H}$ NMR of L2.HCl in $\text{D}_2\text{O}$ , 400 MHz. ....                                                                                                                                                                                                                                                                                                                                                                                                                                                                                                                                                                     | 8  |
| <b>Fig. S4</b> $^{13}\text{C}$ NMR of L2.HCl in $\text{D}_2\text{O}$ , 125 MHz. ....                                                                                                                                                                                                                                                                                                                                                                                                                                                                                                                                                                  | 8  |
| <b>Fig. S5</b> $^1\text{H}$ NMR of <b>1</b> in $\text{DMSO-}d_6$ , 500 MHz. ....                                                                                                                                                                                                                                                                                                                                                                                                                                                                                                                                                                      | 9  |
| <b>Fig. S6</b> $^{13}\text{C}$ NMR of <b>1</b> in $\text{DMSO-}d_6$ , 125 MHz. ....                                                                                                                                                                                                                                                                                                                                                                                                                                                                                                                                                                   | 9  |
| <b>Fig. S7</b> $^{13}\text{C}$ DEPT-135 of <b>1</b> in $\text{DMSO-}d_6$ , 125 MHz. ....                                                                                                                                                                                                                                                                                                                                                                                                                                                                                                                                                              | 10 |
| <b>Fig. S8</b> HMQC of <b>1</b> in $\text{DMSO-}d_6$ . ....                                                                                                                                                                                                                                                                                                                                                                                                                                                                                                                                                                                           | 10 |
| <b>Fig. S9</b> $^{195}\text{Pt}$ NMR of <b>1</b> in $\text{DMSO-}d_6$ , 107.5 MHz. ....                                                                                                                                                                                                                                                                                                                                                                                                                                                                                                                                                               | 11 |
| <b>Fig. S10</b> $^1\text{H}$ NMR of <b>2</b> in $\text{DMSO-}d_6$ , 500 MHz. ....                                                                                                                                                                                                                                                                                                                                                                                                                                                                                                                                                                     | 11 |
| <b>Fig. S11</b> $^{13}\text{C}$ NMR of <b>2</b> in $\text{DMSO-}d_6$ , 125 MHz. ....                                                                                                                                                                                                                                                                                                                                                                                                                                                                                                                                                                  | 12 |
| <b>Fig. S12</b> $^{13}\text{C}$ DEPT-135 of <b>2</b> in $\text{DMSO-}d_6$ , 125 MHz. ....                                                                                                                                                                                                                                                                                                                                                                                                                                                                                                                                                             | 12 |
| <b>Fig. S13</b> HMQC of <b>2</b> in $\text{DMSO-}d_6$ . ....                                                                                                                                                                                                                                                                                                                                                                                                                                                                                                                                                                                          | 13 |
| <b>Fig. S14</b> $^{195}\text{Pt}$ NMR of <b>2</b> in $\text{DMSO-}d_6$ , 107.5 MHz. ....                                                                                                                                                                                                                                                                                                                                                                                                                                                                                                                                                              | 13 |
| <b>Fig. S15</b> Stack plot of aromatic region during the stability kinetics study of complex <b>1</b> in 20% PBS (pD 7.4, prepared in $\text{D}_2\text{O}$ ) – $\text{DMSO-}d_6$ mixture by $^1\text{H}$ NMR, where $\blacklozenge$ & $\bullet$ indicate the intact complex <b>1</b> & complex <b>1b</b> and $\blacktriangle$ & $\blacktriangledown$ indicate the aquated complex <b>1a</b> & <b>1c</b> respectively. ....                                                                                                                                                                                                                            | 14 |
| <b>Fig. S16</b> Stack plot of aromatic region during the binding kinetics study of <b>1</b> with 9-EtG (1:3) in 20% PBS (pD 7.4, prepared in $\text{D}_2\text{O}$ ) – $\text{DMSO-}d_6$ by $^1\text{H}$ NMR, where $\blacklozenge$ & $\bullet$ indicate the intact complex <b>1</b> & complex <b>1b</b> and $\blacktriangle$ & $\blacktriangledown$ indicate the aquated complex <b>1a</b> & <b>1c</b> respectively. $\blacksquare$ indicates the signals of 9-EtG bound complexes <b>1d</b> & <b>1e</b> . <b>H8</b> of free 9-EtG is shifted downfield to <b>H8*</b> & <b>H8**</b> of 9-EtG bound complexes <b>1d</b> & <b>1e</b> respectively. .... | 14 |
| <b>Fig. S17</b> Stack plot of binding kinetics study of <b>1</b> with 9-EtG (1:3) in 20% PBS (pD 7.4, prepared in $\text{D}_2\text{O}$ ) – $\text{DMSO-}d_6$ by $^{195}\text{Pt}$ NMR. The data taken after 2 h shows no binding of 9-EtG with <b>1</b> . After 24 h complex <b>1</b> signal at $-2135.8$ ppm diminished and two poorly resolvable signals of 9-EtG bound complexes <b>1d</b> & <b>1e</b> at $-2203.0$ & $-2205.6$ ppm respectively appear. ....                                                                                                                                                                                      | 15 |
| <b>Table S2</b> Species found in ESI-MS during the stability/binding kinetics studies of <b>1</b> by $^1\text{H}$ NMR .....                                                                                                                                                                                                                                                                                                                                                                                                                                                                                                                           | 15 |

|                                                                                                                                                                                                                                                                                                                                                                                                                                                                                                                                                                                                                                            |    |
|--------------------------------------------------------------------------------------------------------------------------------------------------------------------------------------------------------------------------------------------------------------------------------------------------------------------------------------------------------------------------------------------------------------------------------------------------------------------------------------------------------------------------------------------------------------------------------------------------------------------------------------------|----|
| <b>Fig. S18</b> ESI-MS speciation recorded during monitoring of stability kinetics of the complex <b>1</b> by $^1\text{H}$ NMR after 3 h in 20% PBS (pD 7.4, prepared in $\text{D}_2\text{O}$ ) – $\text{DMSO}-d_6$ mixture. ....                                                                                                                                                                                                                                                                                                                                                                                                          | 18 |
| <b>Fig. S19</b> ESI-MS speciation recorded during monitoring of the 9-EtG binding kinetics with complex <b>1</b> by $^1\text{H}$ NMR after 1 d in 20% PBS (pD 7.4, prepared in $\text{D}_2\text{O}$ ) – $\text{DMSO}-d_6$ mixture. ....                                                                                                                                                                                                                                                                                                                                                                                                    | 18 |
| <b>Fig. S20</b> Observed and simulated isotopic pattern of [ <b>1b</b> (Scheme 4) + $\text{H}^+$ ] found in ESI-MS. ....                                                                                                                                                                                                                                                                                                                                                                                                                                                                                                                   | 19 |
| <b>Fig. S21</b> Observed and simulated isotopic pattern of [ <b>1c</b> (Scheme 4) – $2\text{H}^+ + \text{Na}^+ + \text{K}^+$ ] found in ESI-MS. ....                                                                                                                                                                                                                                                                                                                                                                                                                                                                                       | 20 |
| <b>Fig. S22</b> Observed and simulated isotopic pattern of [ <b>1d</b> (Scheme 4)] found in ESI-MS. .                                                                                                                                                                                                                                                                                                                                                                                                                                                                                                                                      | 21 |
| <b>Fig. S23</b> Observed and simulated isotopic pattern of [ <b>1e</b> (Scheme 4)] found in ESI-MS. .                                                                                                                                                                                                                                                                                                                                                                                                                                                                                                                                      | 22 |
| <b>Fig. S24</b> Stack plot of aromatic region during the stability kinetics study of complex <b>2</b> in 20% PBS (pD 7.4, prepared in $\text{D}_2\text{O}$ ) – $\text{DMSO}-d_6$ mixture by $^1\text{H}$ NMR, where *, # and † indicate the signals of intact complex <b>2</b> , hydrolyzed complex <b>2a</b> and aziridinium ion <b>2b</b> respectively. ....                                                                                                                                                                                                                                                                             | 23 |
| <b>Fig. S25</b> Stack plot of aromatic region during the stability kinetics study of complex <b>2</b> in 20% water – $\text{DMSO}-d_6$ mixture by $^1\text{H}$ NMR, where where *, # and † indicate the signals of intact complex <b>2</b> , hydrolyzed complex <b>2a</b> and aziridinium ion <b>2b</b> respectively. ....                                                                                                                                                                                                                                                                                                                 | 23 |
| <b>Fig. S26</b> Stack plot of stability kinetics study of complex <b>2</b> in $\text{DMSO}-d_6$ by $^1\text{H}$ NMR. ....                                                                                                                                                                                                                                                                                                                                                                                                                                                                                                                  | 24 |
| <b>Fig. S27</b> $^{195}\text{Pt}$ NMR of complex <b>2</b> in $\text{DMSO}-d_6$ after 8 h where peak at –2157.5 and –2973.6 ppm represent the chemical shift of <b>2</b> and $\text{DMSO}$ bound complex <b>2</b> respectively. ....                                                                                                                                                                                                                                                                                                                                                                                                        | 24 |
| <b>Fig. S28</b> Stack plot of stability kinetics study of <b>2</b> (6 mM) in 40% DMEM- $\text{DMSO}-d_6$ by $^{195}\text{Pt}$ NMR. The peak at –2159.8 ppm is for intact complex <b>2</b> and peak at –2956.9 may signify S– bonded <b>2</b> . During experimentation some amount of the native complex precipitated. ....                                                                                                                                                                                                                                                                                                                 | 25 |
| <b>Fig. S29</b> Stack plot of aliphatic region during the binding kinetics study of <b>2</b> with 9-EtG (1:3) in 20% PBS (pD 7.4, prepared in $\text{D}_2\text{O}$ ) – $\text{DMSO}-d_6$ by $^1\text{H}$ NMR, where * and ‡ indicate the signals of intact complex <b>2</b> and 9-EtG bound complexes <b>2d</b> & <b>2e</b> respectively. $\text{NH}_2$ of free 9-EtG is shifted upfield to $\text{NH}_2'$ & $\text{NH}_2''$ of 9-EtG bound complexes <b>2d</b> & <b>2e</b> respectively. $\text{Me}$ of free 9-EtG is shifted downfield to $\text{Me}'$ & $\text{Me}''$ of 9-EtG bound complexes <b>2d</b> & <b>2e</b> respectively. .... | 25 |
| <b>Fig. S30</b> Stack plot of binding kinetics study of <b>2</b> with 9-EtG (1:3) in 20% PBS (pD 7.4, prepared in $\text{D}_2\text{O}$ ) – $\text{DMSO}-d_6$ by $^{195}\text{Pt}$ NMR. The data taken after 2 h shows no binding of 9-EtG with <b>2</b> . After 24 h complex <b>2</b> signal at –2159.8 ppm diminished and two closely spaced signals of 9-EtG bound complexes <b>2d</b> & <b>2e</b> at –2216.0 & –2205.0 ppm respectively appear. ....                                                                                                                                                                                    | 26 |
| <b>Fig. S31</b> Stack plot of aliphatic region during the binding kinetics study of <b>2</b> with GSH in 20% PBS (pD 7.4, prepared in $\text{D}_2\text{O}$ ) – $\text{DMSO}-d_6$ by $^1\text{H}$ NMR, where *, § and † indicate                                                                                                                                                                                                                                                                                                                                                                                                            |    |

|                                                                                                                                                                                                                                                                                                                                                                                                                                                                                                                                          |    |
|------------------------------------------------------------------------------------------------------------------------------------------------------------------------------------------------------------------------------------------------------------------------------------------------------------------------------------------------------------------------------------------------------------------------------------------------------------------------------------------------------------------------------------------|----|
| the signals of intact complex <b>2</b> , GSH bound complex <b>2c</b> and aziridinium ion <b>2b</b> respectively. ....                                                                                                                                                                                                                                                                                                                                                                                                                    | 26 |
| <b>Fig. S32</b> Stack plot of aromatic region during the binding kinetics study of <b>2</b> with GSH in 20% PBS (pD 7.4, prepared in D <sub>2</sub> O) – DMF- <i>d</i> <sub>7</sub> by <sup>1</sup> H NMR, where *, § and † indicate the signals of intact complex <b>2</b> , GSH bound complex <b>2c</b> and aziridinium ion <b>2b</b> respectively. ....                                                                                                                                                                               | 27 |
| <b>Fig. S33</b> Stack plot of binding kinetics study of <b>2</b> with GSH (1:3) in 20% PBS (pD 7.4, prepared in D <sub>2</sub> O) – DMF- <i>d</i> <sub>7</sub> by <sup>195</sup> Pt NMR.. After 6 h complex signal GSH bound complex <b>2c</b> at –2910.9 ppm appears along with initial signal of complex <b>2</b> at –2164.6 ppm. After a day the <sup>195</sup> Pt signal of <b>2c</b> vanishes with very small amount of unreacted complex <b>2</b> signal. ....                                                                     | 27 |
| <b>Fig. S34</b> Stack plot of IR spectra of <b>2</b> , GSH and yellow ppt found in the reaction of <b>2</b> with GSH (1:3) in 20% PBS (pD 7.4, prepared in D <sub>2</sub> O) – DMF- <i>d</i> <sub>7</sub> . A) Sharp band of C–Cl stretching frequency 772 cm <sup>–1</sup> of <b>2</b> vanished in yellow ppt. B) Carbonyl stretching band of GSH and yellow ppt. C) S–H stretching band at 2522 cm <sup>–1</sup> in GSH vanished in yellow ppt and a broad band at 3550–2700 cm <sup>–1</sup> for polymeric nature of yellow ppt. .... | 28 |
| <b>Table S3</b> Species found in ESI-MS during the stability/binding kinetics studies of <b>2</b> by <sup>1</sup> H NMR. The drawings of the respective species are given below the tabulated data .....                                                                                                                                                                                                                                                                                                                                 | 29 |
| <b>Fig. S35</b> ESI-MS speciation recorded during monitoring of stability kinetics of the complex <b>2</b> by <sup>1</sup> H NMR after 1 d in 20% PBS (pD 7.4, prepared in D <sub>2</sub> O) – DMSO- <i>d</i> <sub>6</sub> mixture. ....                                                                                                                                                                                                                                                                                                 | 31 |
| <b>Fig. S36</b> ESI-MS speciation recorded during monitoring of stability kinetics of the complex <b>2</b> by <sup>1</sup> H NMR after 3 d in 20% water – DMSO- <i>d</i> <sub>6</sub> mixture.....                                                                                                                                                                                                                                                                                                                                       | 32 |
| <b>Fig. S37</b> ESI-MS speciation recorded during monitoring of the 9-EtG binding kinetics with complex <b>2</b> by <sup>1</sup> H NMR after 2 d in 20% PBS (pD 7.4, prepared in D <sub>2</sub> O) – DMSO- <i>d</i> <sub>6</sub> mixture. ....                                                                                                                                                                                                                                                                                           | 32 |
| <b>Fig. S38</b> ESI-MS speciation recorded during monitoring of the GSH binding kinetics with complex <b>2</b> by <sup>1</sup> H NMR after 2 h in 20% PBS (pD 7.4, prepared in D <sub>2</sub> O) – DMSO- <i>d</i> <sub>6</sub> mixture. ....                                                                                                                                                                                                                                                                                             | 33 |
| .....                                                                                                                                                                                                                                                                                                                                                                                                                                                                                                                                    | 33 |
| <b>Fig. S39</b> ESI-MS speciation recorded during monitoring of the GSH binding kinetics with complex <b>2</b> by <sup>1</sup> H NMR after 1 d in 20% PBS (pD 7.4, prepared in D <sub>2</sub> O) – DMSO- <i>d</i> <sub>6</sub> mixture. ....                                                                                                                                                                                                                                                                                             | 33 |
| <b>Fig. S40</b> Observed and simulated isotopic pattern of [ <b>2a</b> (Scheme 5) – 2H <sup>+</sup> + Na <sup>+</sup> + K <sup>+</sup> ] found in ESI-MS. ....                                                                                                                                                                                                                                                                                                                                                                           | 34 |
| <b>Fig. S41</b> Observed and simulated isotopic pattern of [ <b>2b</b> (Scheme 5)] found in ESI-MS. .                                                                                                                                                                                                                                                                                                                                                                                                                                    | 35 |
| <b>Fig. S42</b> Observed and simulated isotopic pattern of [ <b>2c</b> (Scheme 5)] found in ESI-MS. .                                                                                                                                                                                                                                                                                                                                                                                                                                    | 36 |
| <b>Fig. S43</b> Observed and simulated isotopic pattern of [ <b>2d</b> (Scheme 5)] found in ESI-MS. .                                                                                                                                                                                                                                                                                                                                                                                                                                    | 37 |
| <b>Fig. S44</b> Observed and simulated isotopic pattern of [ <b>2e</b> (Scheme 5)] found in ESI-MS. .                                                                                                                                                                                                                                                                                                                                                                                                                                    | 38 |

|                                                                                                                                                                                                                                                                                                                                                                                                                                                                |    |
|----------------------------------------------------------------------------------------------------------------------------------------------------------------------------------------------------------------------------------------------------------------------------------------------------------------------------------------------------------------------------------------------------------------------------------------------------------------|----|
| <b>Fig. S45</b> Plots of cell viability (%) vs. log of $\mu\text{M}$ concentrations of <b>1</b> against A) MCF-7 and B) HeLa WT cell lines after incubation for 48 h determined from MTT assays under normoxic condition. The plots provided are for one independent experiment out of the three independent experiments.....                                                                                                                                  | 39 |
| <b>Fig. S46</b> Plots of cell viability (%) vs. log of $\mu\text{M}$ concentrations of <b>2</b> against A) MCF-7, B) A549, C) HeLa WT, D) MIA PaCa2 and E) HEK293 cell lines after incubation for 48 h determined from MTT assays under normoxic condition. The plots provided are for one independent experiment out of the three independent experiments. ....                                                                                               | 39 |
| <b>Fig. S47</b> Plots of cell viability (%) vs. log of $\mu\text{M}$ concentrations of <b>2</b> against A) MCF-7 and B) A549 cell lines after incubation for 48 h determined from MTT assays under normoxic condition in presence of 250 $\mu\text{M}$ and 400 $\mu\text{M}$ GSH respectively. The plots provided are for one independent experiment out of the three independent experiments. ....                                                            | 39 |
| <b>Fig. S48</b> Plots of cell viability (%) vs. log of $\mu\text{M}$ concentrations of <b>2</b> against A) MCF-7 and B) A549 cell lines after incubation for 48 h determined from MTT assays under hypoxic condition. The plots provided are for one independent experiment out of the three independent experiments. ....                                                                                                                                     | 40 |
| <b>Fig. S49</b> Plots of cell viability (%) vs. log of $\mu\text{M}$ concentrations of <b>2</b> against A) MCF-7 and B) A549 cell lines after incubation for 48 h determined from MTT assays under hypoxic condition in presence of 250 $\mu\text{M}$ and 400 $\mu\text{M}$ GSH respectively. The plots provided are for one independent experiment out of the three independent experiments. ....                                                             | 40 |
| <b>Fig. S50</b> Plots of cell viability (%) vs. log of $\mu\text{M}$ concentrations of <b>2</b> against A) MIA PaCa2 cell line after incubation for 48 h determine from MTT assays under hypoxic condition and B) MIA PaCa2 cell lines after incubation for 48 h under hypoxic condition in presence of 100 $\mu\text{M}$ GSH determined from MTT assays. The plots provided are for one independent experiment out of the three independent experiments. .... | 40 |
| <b>Fig. S51</b> Cell cycle arrest of MCF-7 treated with <b>2</b> for 24 h. (A) DMSO control, (B) 6 $\mu\text{M}$ , (C) 8 $\mu\text{M}$ and D) 10 $\mu\text{M}$ of <b>2</b> treated cells. The figure represents one independent experiment.....                                                                                                                                                                                                                | 41 |
| <b>Fig. S52</b> Cell cycle arrest of MCF-7 treated with cisplatin for 24 h. (A) DMSO control, (B) 2 $\mu\text{M}$ , (C) 4 $\mu\text{M}$ and D) 6 $\mu\text{M}$ of cisplatin treated cells. The figure represents one independent experiment. ....                                                                                                                                                                                                              | 41 |
| <b>Fig. S53</b> Cell cycle arrest of MIA PaCa2 treated with <b>2</b> and cisplatin respectively for 24 h. (A) DMSO control, (B) 2.5 $\mu\text{M}$ , (C) 3.5 $\mu\text{M}$ and D) 4.5 $\mu\text{M}$ of <b>2</b> and 15 $\mu\text{M}$ of cisplatin treated cells. The figure represents one independent experiment. ....                                                                                                                                         | 41 |
| <b>Table S4</b> Cell cycle analysis of MCF-7 cells treated with <b>2</b> <sup>a</sup> .....                                                                                                                                                                                                                                                                                                                                                                    | 42 |
| <b>Table S5</b> Cell cycle analysis of MCF-7 cells treated with cisplatin <sup>a</sup> .....                                                                                                                                                                                                                                                                                                                                                                   | 42 |
| <b>Table S6</b> Cell cycle analysis of MIA PaCa2 cells treated with <b>2</b> and cisplatin <sup>a</sup> .....                                                                                                                                                                                                                                                                                                                                                  | 42 |

**Table S1** Crystal Data, data Collection and refinement parameters for complex **2**

| <b>2</b>                                            |                                                                                           |
|-----------------------------------------------------|-------------------------------------------------------------------------------------------|
| Empirical formula                                   | C <sub>10</sub> H <sub>14</sub> Cl <sub>4</sub> N <sub>2</sub> Pt                         |
| Formula weight                                      | 499.12                                                                                    |
| Temperature (K)                                     | 100.01(10)                                                                                |
| Wavelength (Å)                                      | 0.7107                                                                                    |
| Crystal system,<br>space group                      | Monoclinic<br><i>P</i> 2 <sub>1</sub> / <i>c</i>                                          |
| <i>a</i> (Å)                                        | 8.5829(11)                                                                                |
| <i>b</i> (Å)                                        | 10.4134(11)                                                                               |
| <i>c</i> (Å)                                        | 15.2859(16)                                                                               |
| $\alpha$ (deg.)                                     | 90.00                                                                                     |
| $\beta$ (deg.)                                      | 98.85(10)                                                                                 |
| $\gamma$ (deg.)                                     | 90.00                                                                                     |
| Volume (Å <sup>3</sup> )                            | 1350.0(3)                                                                                 |
| <i>Z</i> , Calculated density (mg/mm <sup>3</sup> ) | 4, 2.456                                                                                  |
| <i>F</i> (000)                                      | 936.0                                                                                     |
| $\mu$ /mm <sup>-1</sup>                             | 11.163                                                                                    |
| Max. and min. transmission                          | 0.518 and 1.000                                                                           |
| Goodness-of-fit on <i>F</i> <sup>2</sup>            | 1.008                                                                                     |
| Final <i>R</i> indices [ <i>I</i> > 2σ( <i>I</i> )] | <sup>a</sup> <i>R</i> <sub>1</sub> = 0.0326, <sup>b</sup> <i>wR</i> <sub>2</sub> = 0.0665 |
| <i>R</i> indices (all data)                         | <sup>a</sup> <i>R</i> <sub>1</sub> = 0.0391, <sup>b</sup> <i>wR</i> <sub>2</sub> = 0.0712 |

$$^a R_1 = \Sigma |F_o| - |F_c| / \Sigma |F_o|, \quad ^b wR_2 = [\Sigma [w(F_o^2 - F_c^2)^2] / \Sigma w(F_o^2)^2]^{1/2}$$

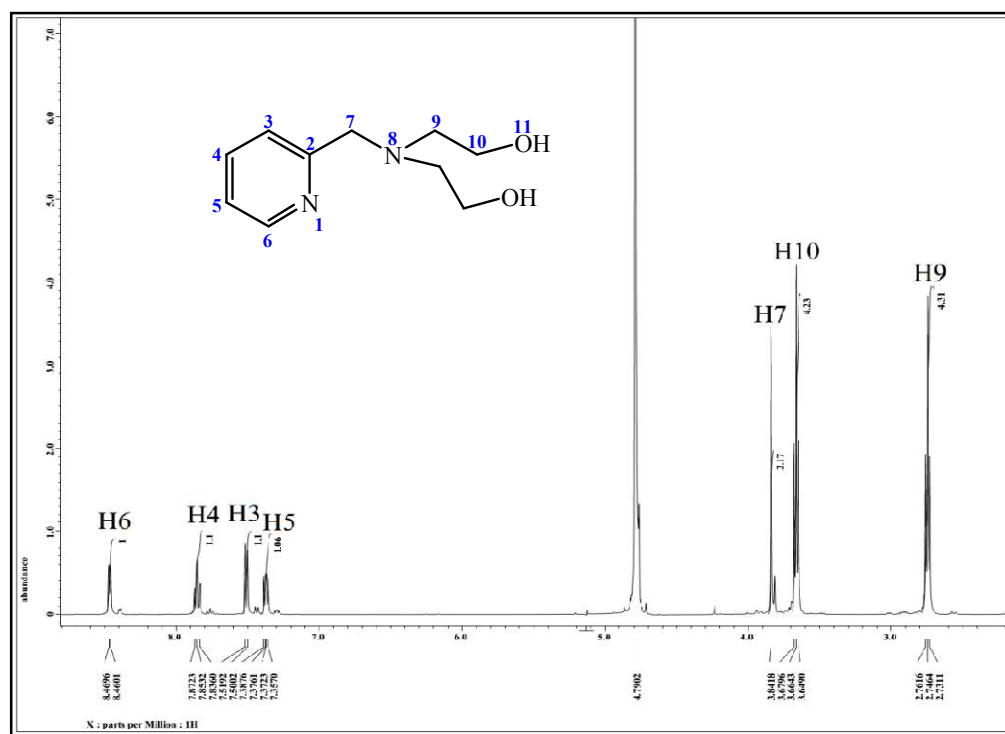

Fig. S1  $^1\text{H}$  NMR of L1 in  $\text{D}_2\text{O}$ , 400 MHz.

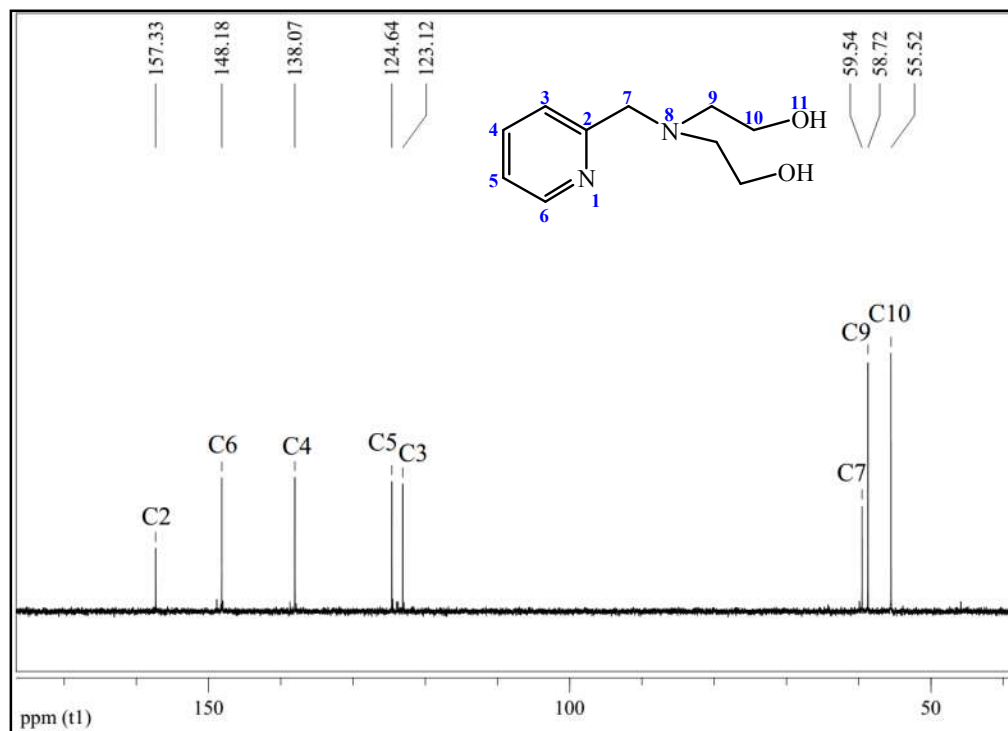

Fig. S2  $^{13}\text{C}$  NMR of L1 in  $\text{D}_2\text{O}$ , 125 MHz.

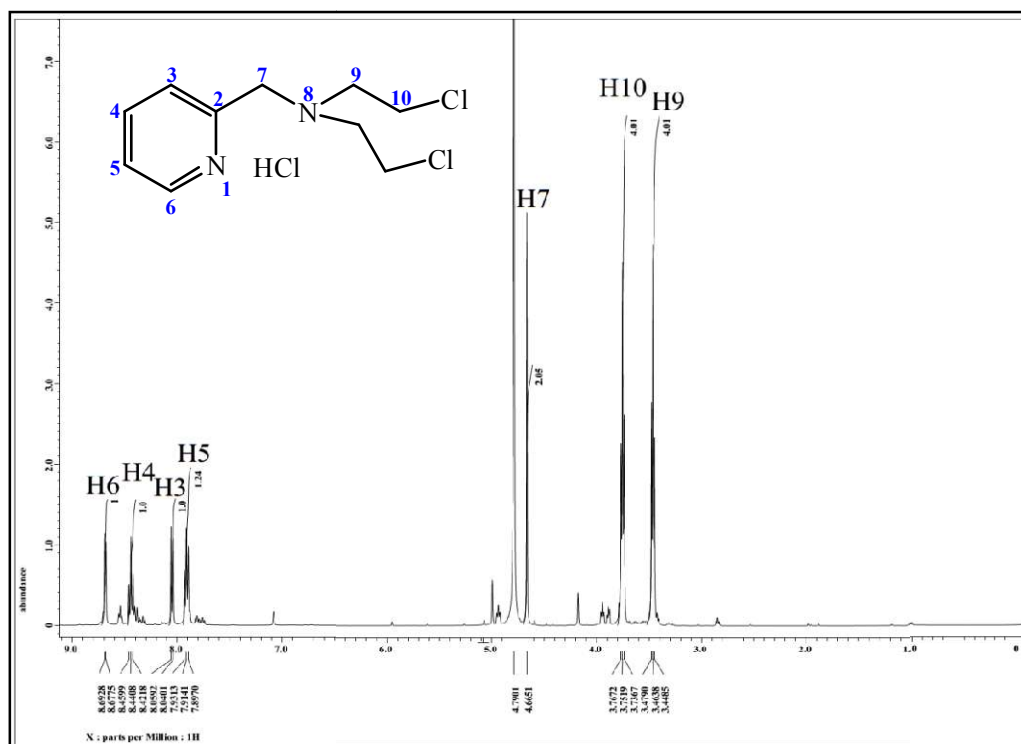

**Fig. S3** <sup>1</sup>H NMR of L2.HCl in D<sub>2</sub>O, 400 MHz.

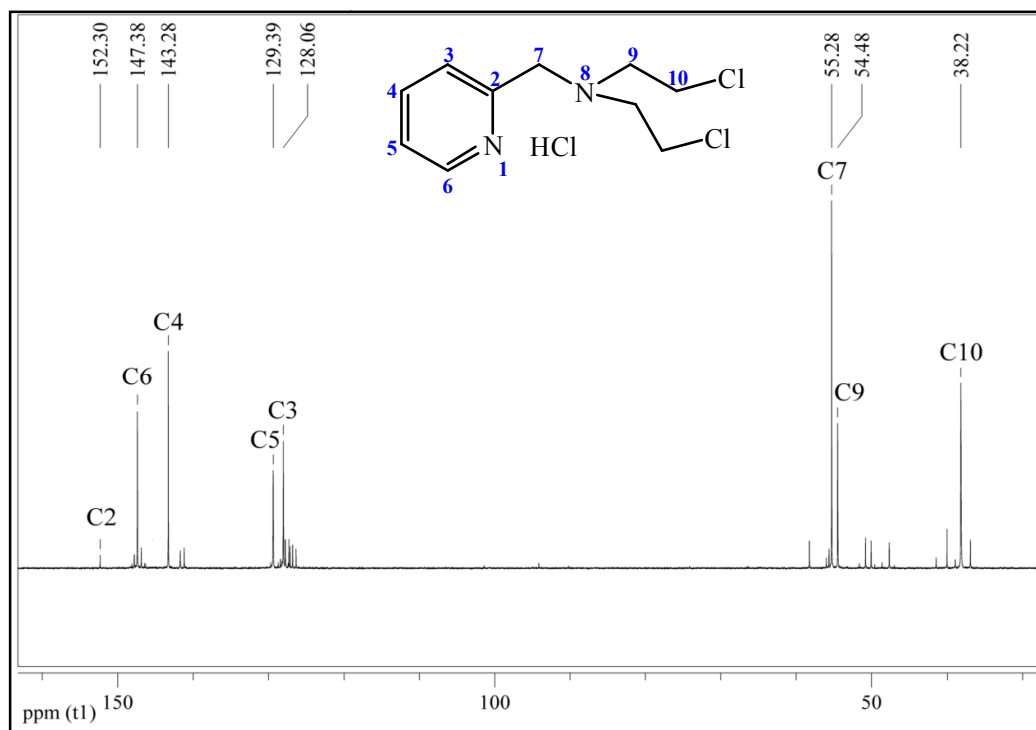

**Fig. S4** <sup>13</sup>C NMR of L2.HCl in D<sub>2</sub>O, 125 MHz.



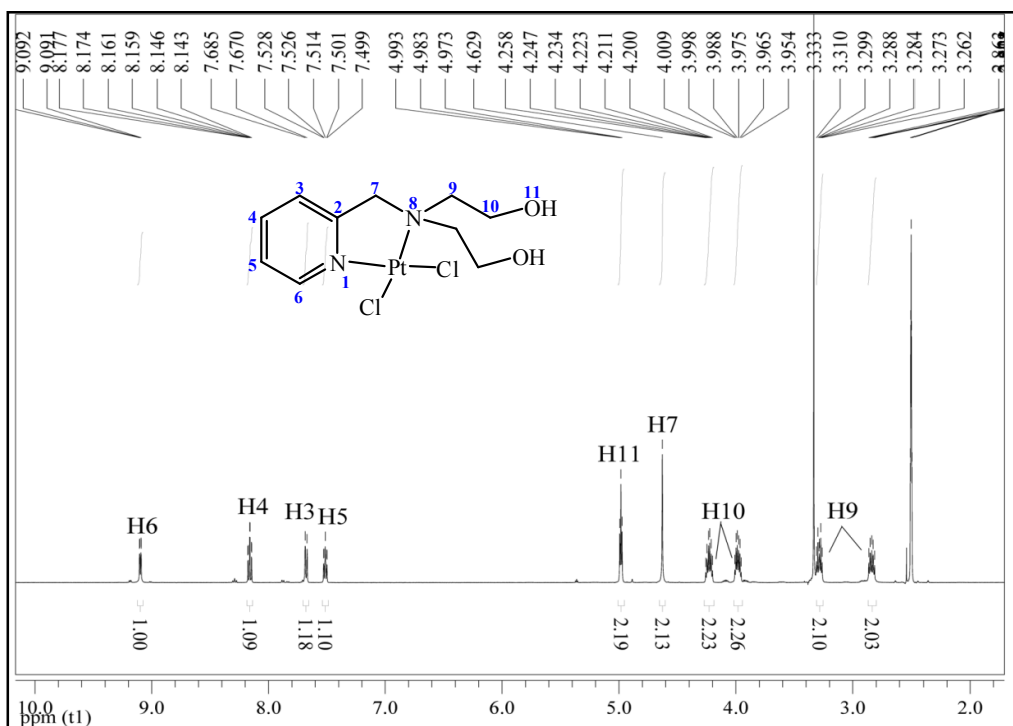

**Fig. S5**  $^1\text{H}$  NMR of **1** in  $\text{DMSO-}d_6$ , 500 MHz.

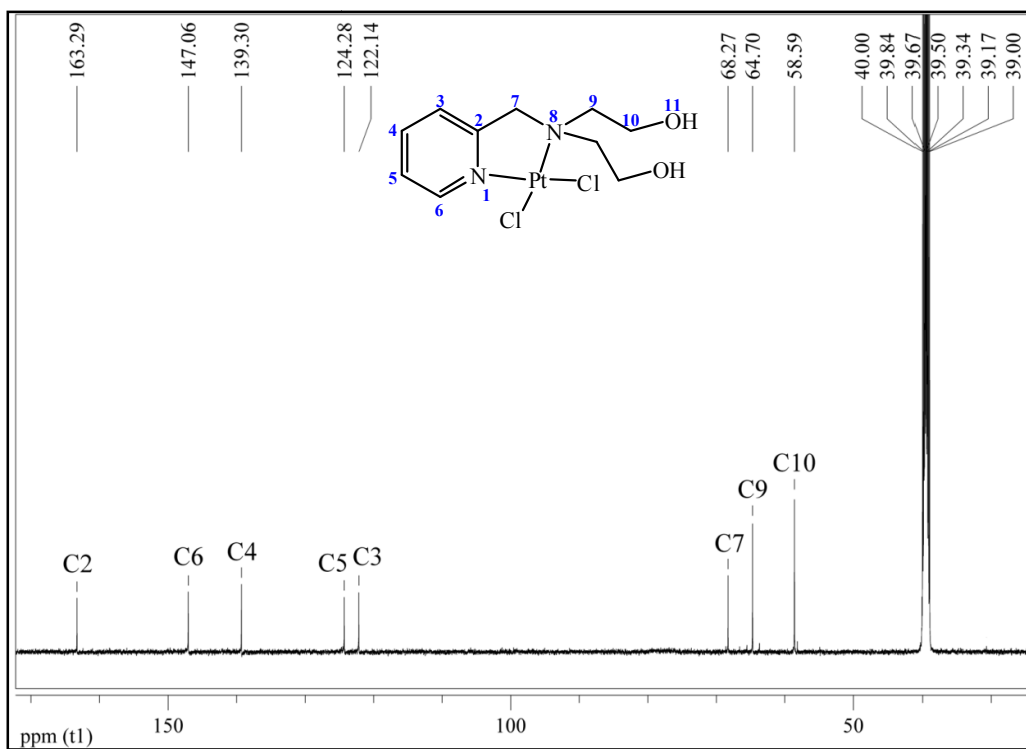

**Fig. S6**  $^{13}\text{C}$  NMR of **1** in  $\text{DMSO-}d_6$ , 125 MHz.

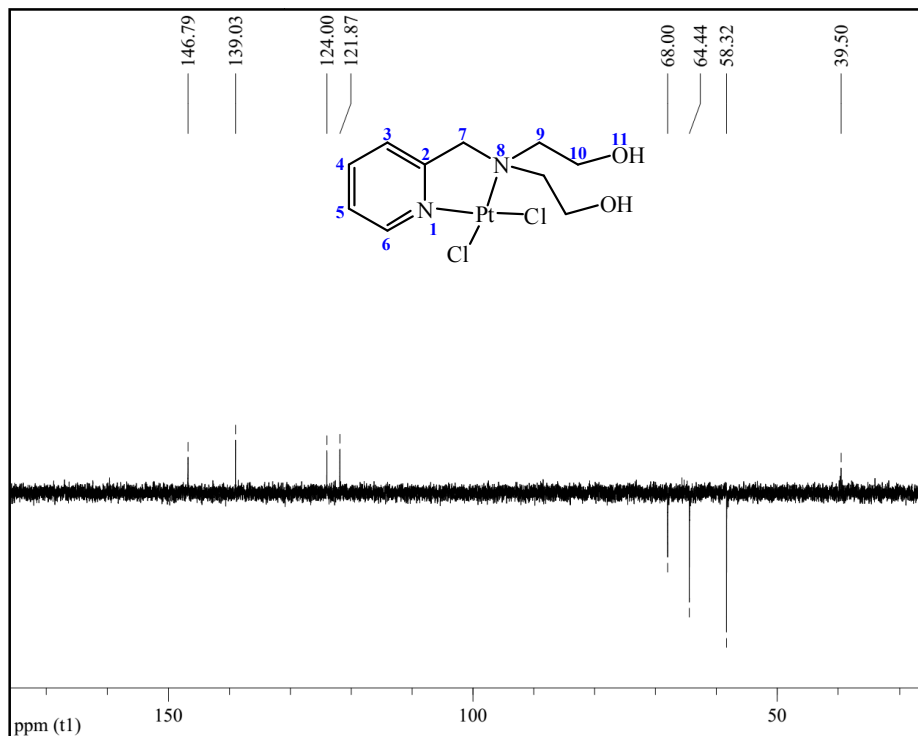

**Fig. S7** <sup>13</sup>C DEPT-135 of **1** in DMSO-*d*<sub>6</sub>, 125 MHz.

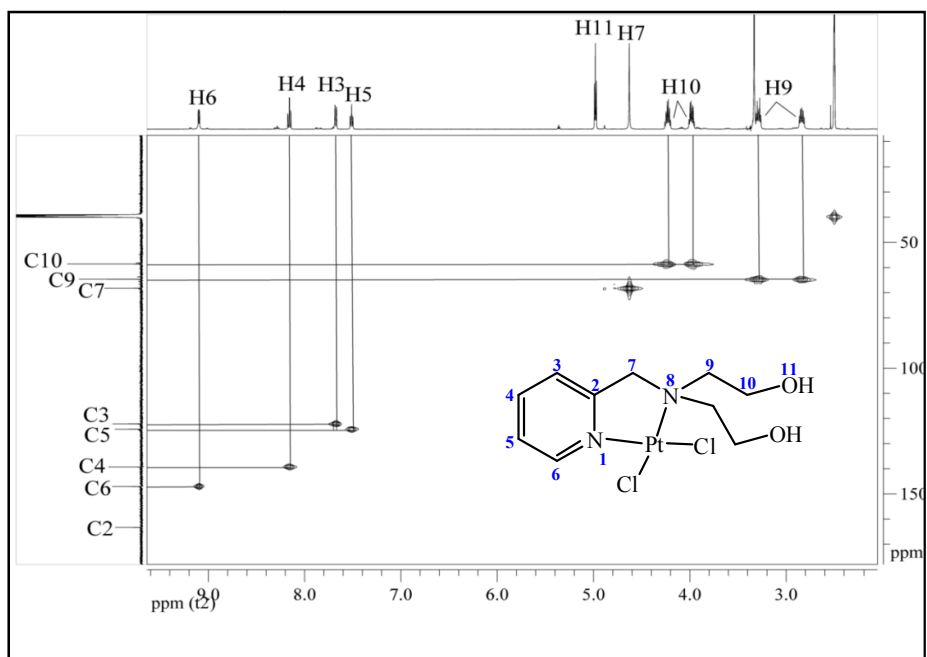

**Fig. S8** HMQC of **1** in DMSO-*d*<sub>6</sub>.

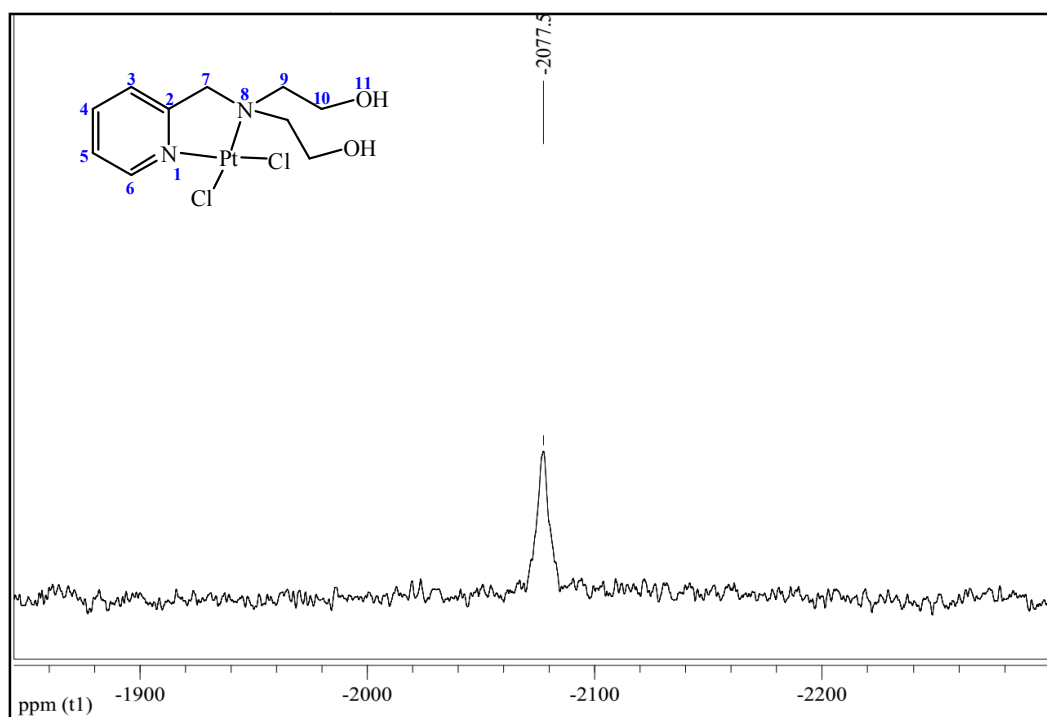

**Fig. S9**  $^{195}\text{Pt}$  NMR of **1** in  $\text{DMSO-}d_6$ , 107.5 MHz.

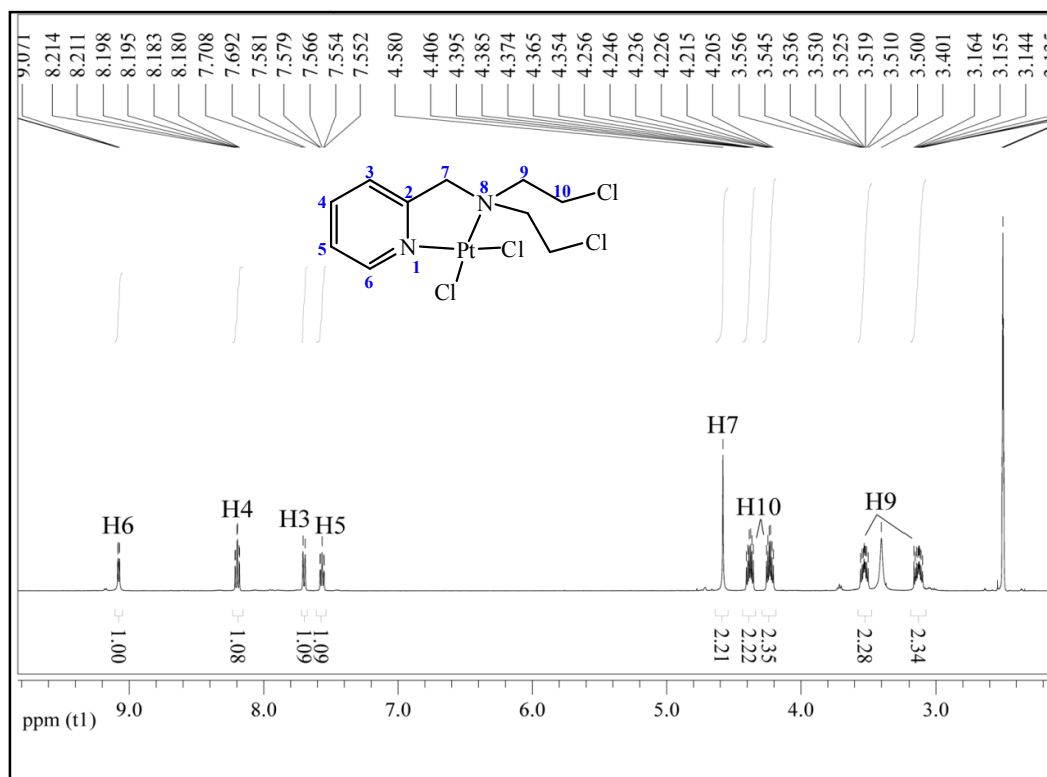

**Fig. S10**  $^1\text{H}$  NMR of **2** in  $\text{DMSO-}d_6$ , 500 MHz.

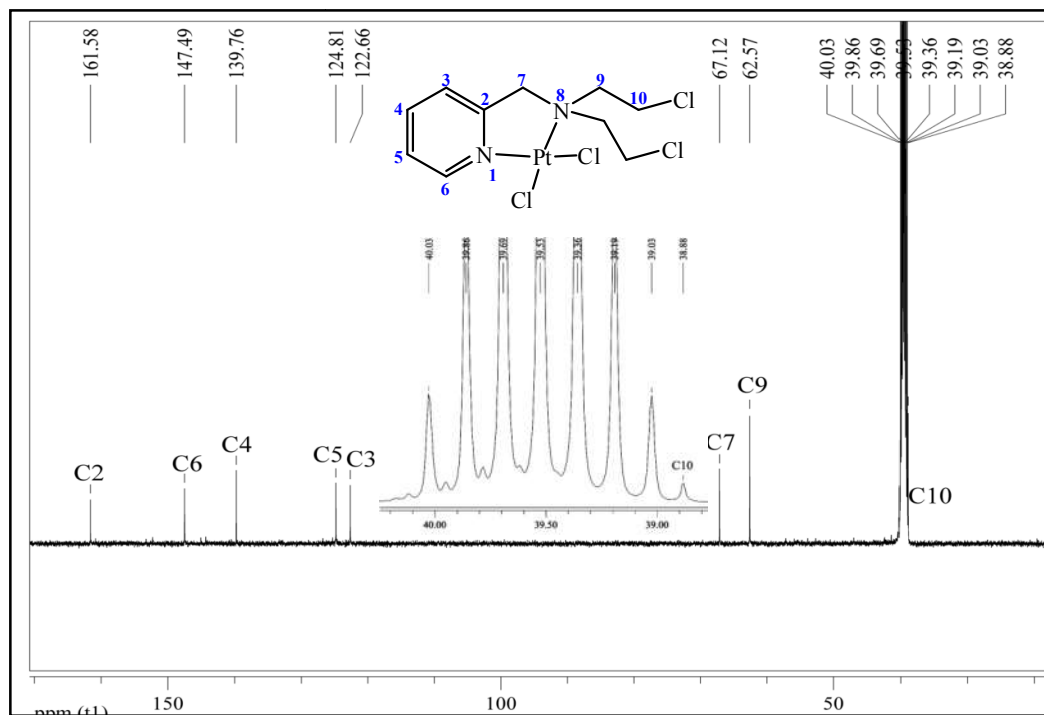

**Fig. S11** <sup>13</sup>C NMR of **2** in DMSO-*d*<sub>6</sub>, 125 MHz.

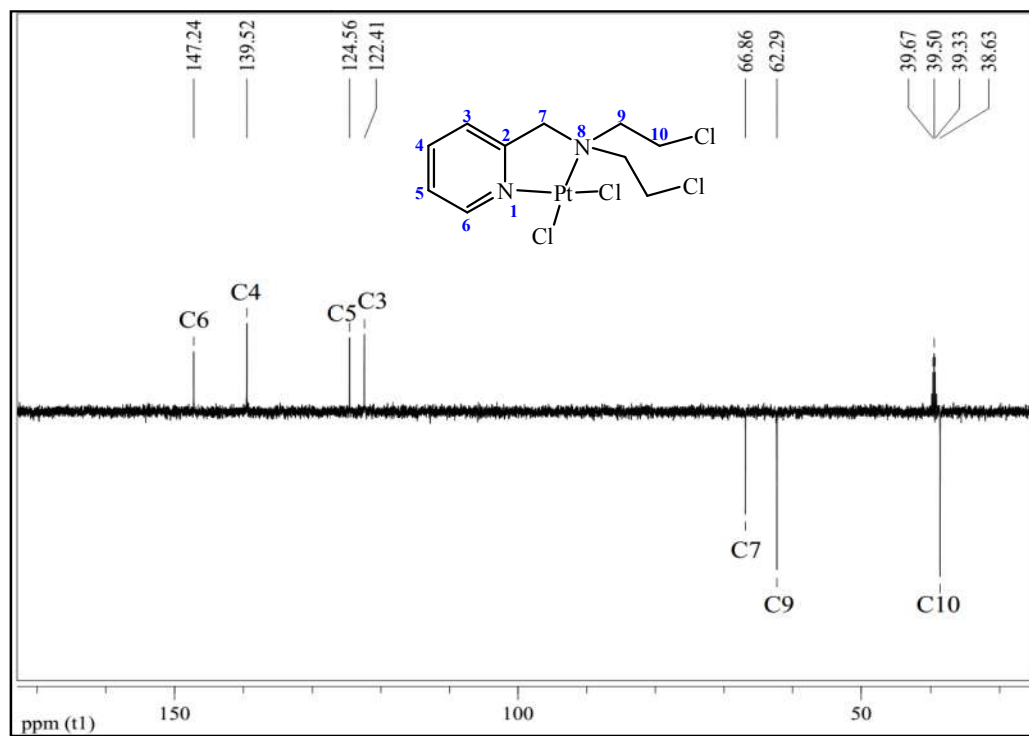

**Fig. S12** <sup>13</sup>C DEPT-135 of **2** in DMSO-*d*<sub>6</sub>, 125 MHz.

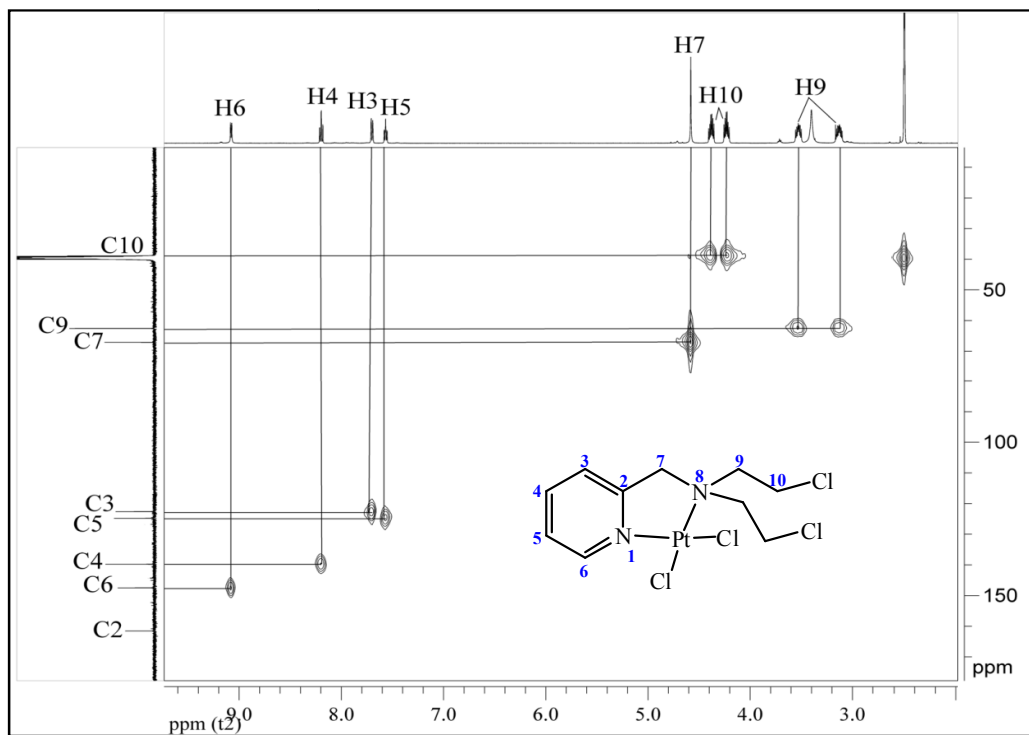

**Fig. S13** HMQC of **2** in DMSO- $d_6$ .

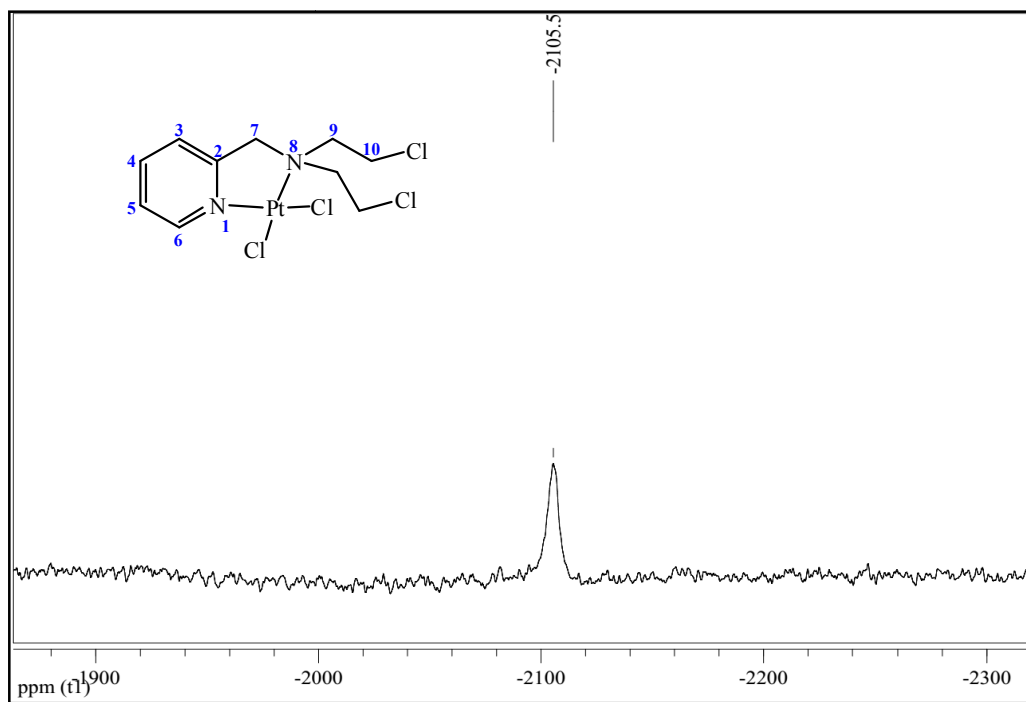

**Fig. S14**  $^{195}\text{Pt}$  NMR of **2** in DMSO- $d_6$ , 107.5 MHz.

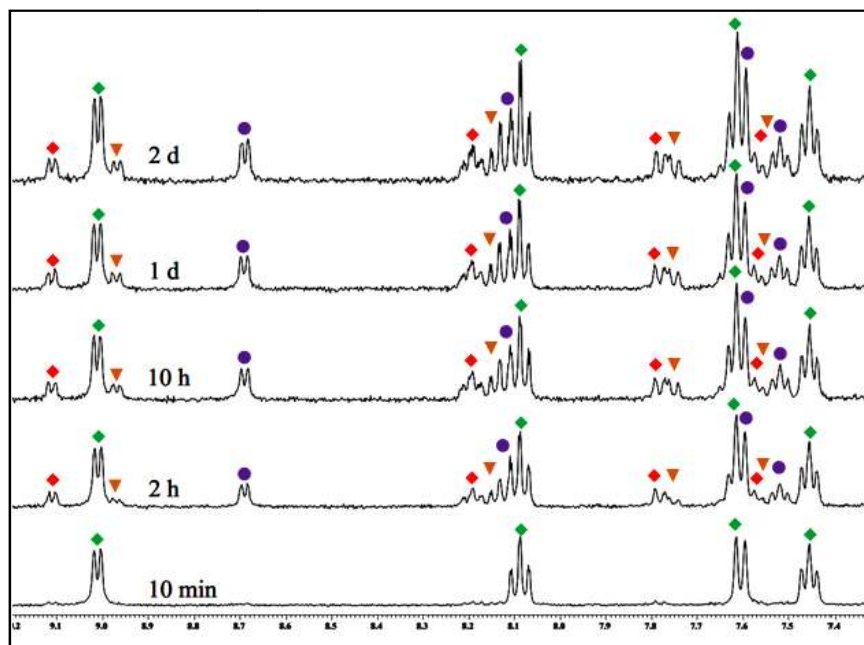

**Fig. S15** Stack plot of aromatic region during the stability kinetics study of complex **1** in 20% PBS (pD 7.4, prepared in D<sub>2</sub>O) – DMSO-*d*<sub>6</sub> mixture by <sup>1</sup>H NMR, where ♦ & ● indicate the intact complex **1** & complex **1b** and ▲ & ▼ indicate the aquated complex **1a** & **1c** respectively.

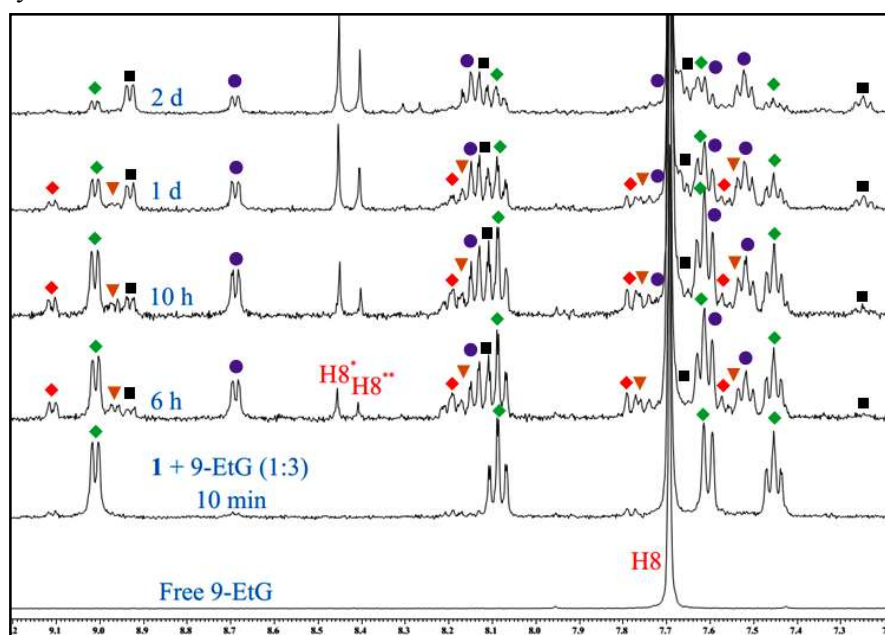

**Fig. S16** Stack plot of aromatic region during the binding kinetics study of **1** with 9-EtG (1:3) in 20% PBS (pD 7.4, prepared in D<sub>2</sub>O) – DMSO-*d*<sub>6</sub> by <sup>1</sup>H NMR, where ♦ & ● indicate the intact complex **1** & complex **1b** and ▲ & ▼ indicate the aquated complex **1a** & **1c** respectively. ■ indicates the signals of 9-EtG bound complexes **1d** & **1e**. H8 of free 9-EtG is shifted downfield to H8\* & H8\*\* of 9-EtG bound complexes **1d** & **1e** respectively.

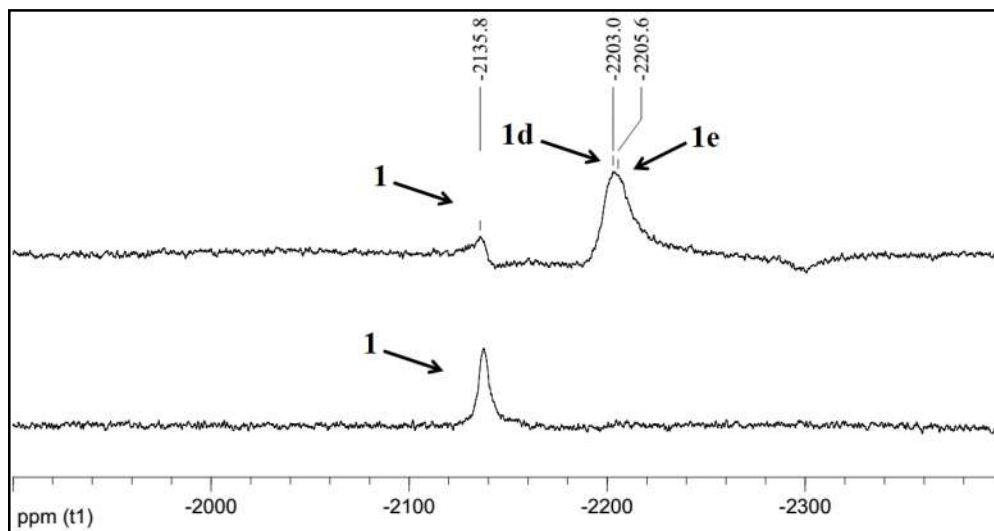

**Fig. S17** Stack plot of binding kinetics study of **1** with 9-EtG (1:3) in 20% PBS (pD 7.4, prepared in D<sub>2</sub>O) – DMSO-*d*<sub>6</sub> by <sup>195</sup>Pt NMR. The data taken after 2 h shows no binding of 9-EtG with **1**. After 24 h complex **1** signal at –2135.8 ppm diminished and two poorly resolvable signals of 9-EtG bound complexes **1d** & **1e** at –2203.0 & –2205.6 ppm respectively appear.

**Table S2** Species found in ESI-MS during the stability/binding kinetics studies of **1** by <sup>1</sup>H NMR

| Species<br>no. | Drawings                                                                            | $m/z_{\text{calc}}$ | Experiments                                                                          |                                                                                                    |
|----------------|-------------------------------------------------------------------------------------|---------------------|--------------------------------------------------------------------------------------|----------------------------------------------------------------------------------------------------|
|                |                                                                                     |                     | <b>1</b> in 20% PBS<br>(pD 7.4,<br>prepared in<br>D <sub>2</sub> O) – DMSO-<br>$d_6$ | <b>1</b> + 9-EtG (1:3)<br>in 20% PBS (pD<br>7.4, prepared in<br>D <sub>2</sub> O) – DMSO-<br>$d_6$ |
|                |                                                                                     |                     | $m/z_{\text{obs}}$                                                                   |                                                                                                    |
| I-a            | 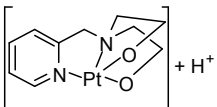 | 390.0782            | 390.0811                                                                             | 390.0747                                                                                           |
| I-b            |  | 427.0539            | 427.0484                                                                             | 427.0508                                                                                           |

Table S2 contd.

**Table S2** Species found in ESI-MS during the stability/binding kinetics studies of **1** by  $^1\text{H}$  NMR

| Species<br>no. | Drawings                                                                            | $m/z_{\text{calc}}$ | Experiments                                                                          |                                                                                                    |
|----------------|-------------------------------------------------------------------------------------|---------------------|--------------------------------------------------------------------------------------|----------------------------------------------------------------------------------------------------|
|                |                                                                                     |                     | <b>1</b> in 20% PBS<br>(pD 7.4,<br>prepared in<br>D <sub>2</sub> O) – DMSO-<br>$d_6$ | <b>1</b> + 9-EtG (1:3)<br>in 20% PBS (pD<br>7.4, prepared in<br>D <sub>2</sub> O) – DMSO-<br>$d_6$ |
|                |                                                                                     |                     | $m/z_{\text{obs}}$                                                                   |                                                                                                    |
| I-c            | 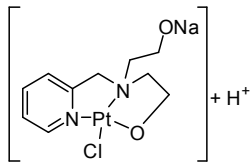   | 449.0359            | 449.0396                                                                             | 449.0314                                                                                           |
| I-d            |    | 468.0266            | 468.0757                                                                             | 468.0773                                                                                           |
| I-e            |    | 505.0022            | 505.0659                                                                             | 505.0778                                                                                           |
| I-f            |  | 180.0885            | -                                                                                    | 180.0867                                                                                           |
| I-g            |  | 202.0705            | -                                                                                    | 202.0697                                                                                           |
| I-h            |  | 218.0444            | -                                                                                    | 218.0405                                                                                           |
| I-i            |  | 381.1512            | -                                                                                    | 381.1513                                                                                           |

Table S2 contd.



**Table S2** Species found in ESI-MS during the stability/binding kinetics studies of **1** by  $^1\text{H}$  NMR

| Species no. | Drawings                                                                            | $m/z_{\text{calc}}$ | Experiments                                                                              |                                                                                                        |
|-------------|-------------------------------------------------------------------------------------|---------------------|------------------------------------------------------------------------------------------|--------------------------------------------------------------------------------------------------------|
|             |                                                                                     |                     | <b>1</b> in 20% PBS (pD 7.4, prepared in D <sub>2</sub> O) – DMSO- <i>d</i> <sub>6</sub> | <b>1</b> + 9-EtG (1:3) in 20% PBS (pD 7.4, prepared in D <sub>2</sub> O) – DMSO- <i>d</i> <sub>6</sub> |
|             |                                                                                     |                     | $m/z_{\text{obs}}$                                                                       |                                                                                                        |
| I-j         | 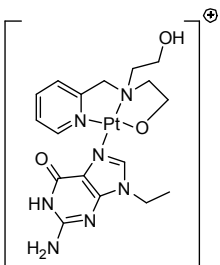   | 569.1589            | -                                                                                        | 569.1595                                                                                               |
| I-k         |   | 606.1349            | -                                                                                        | 606.1368                                                                                               |
| I-l         |  | 739.3126            | -                                                                                        | 739.3171                                                                                               |

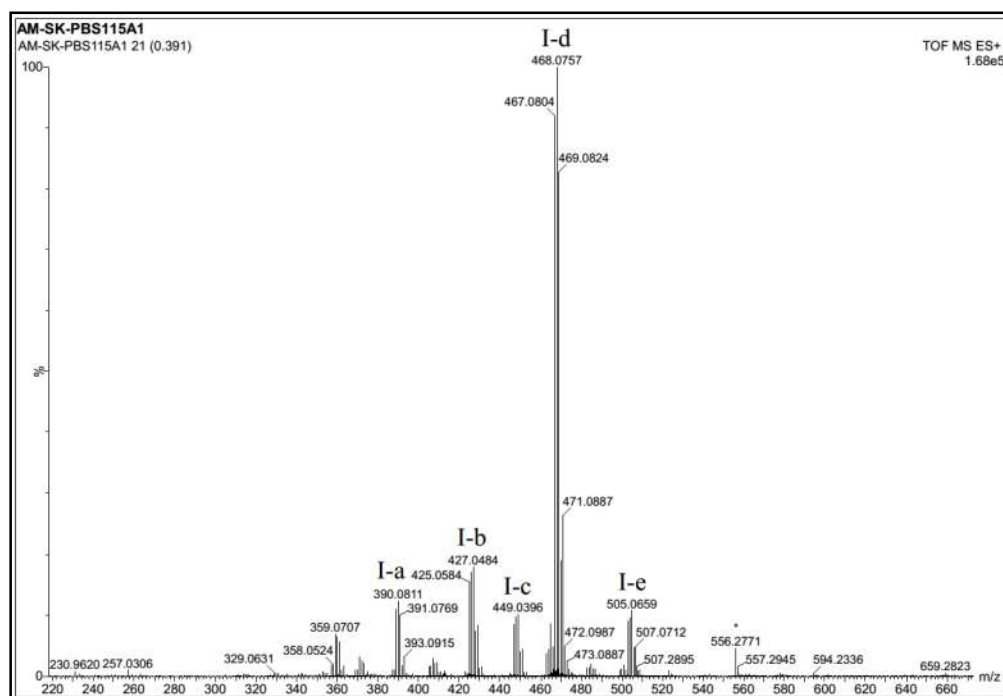

**Fig. S18** ESI-MS speciation recorded during monitoring of stability kinetics of the complex **1** by  $^1\text{H}$  NMR after 3 h in 20% PBS (pD 7.4, prepared in  $\text{D}_2\text{O}$ ) –  $\text{DMSO-}d_6$  mixture.

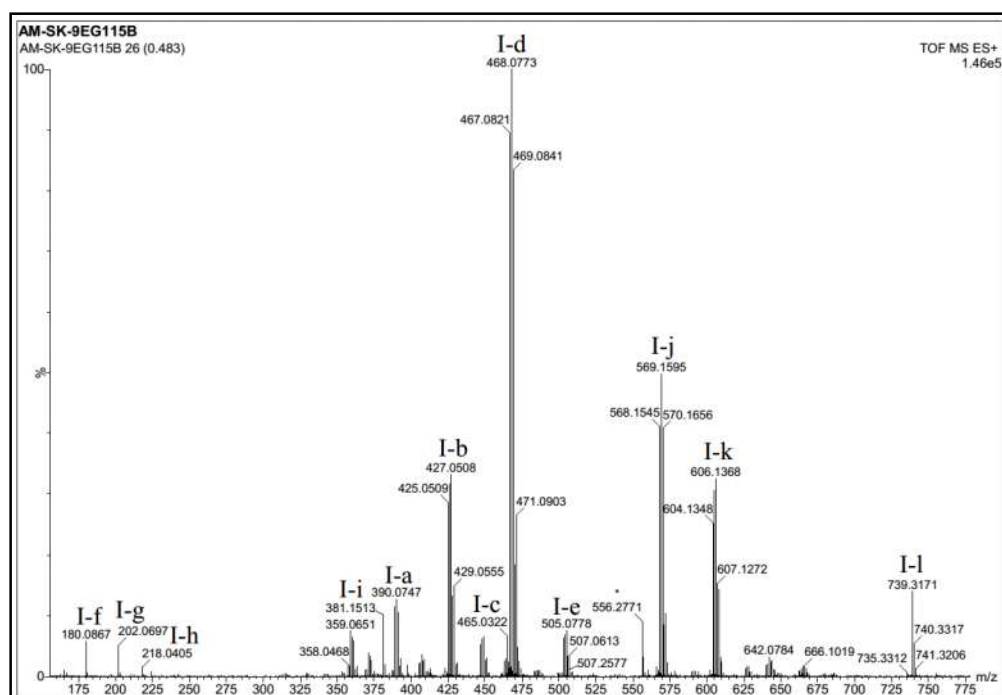

**Fig. S19** ESI-MS speciation recorded during monitoring of the 9-EtG binding kinetics with complex **1** by  $^1\text{H}$  NMR after 1 d in 20% PBS (pD 7.4, prepared in  $\text{D}_2\text{O}$ ) –  $\text{DMSO-}d_6$  mixture.

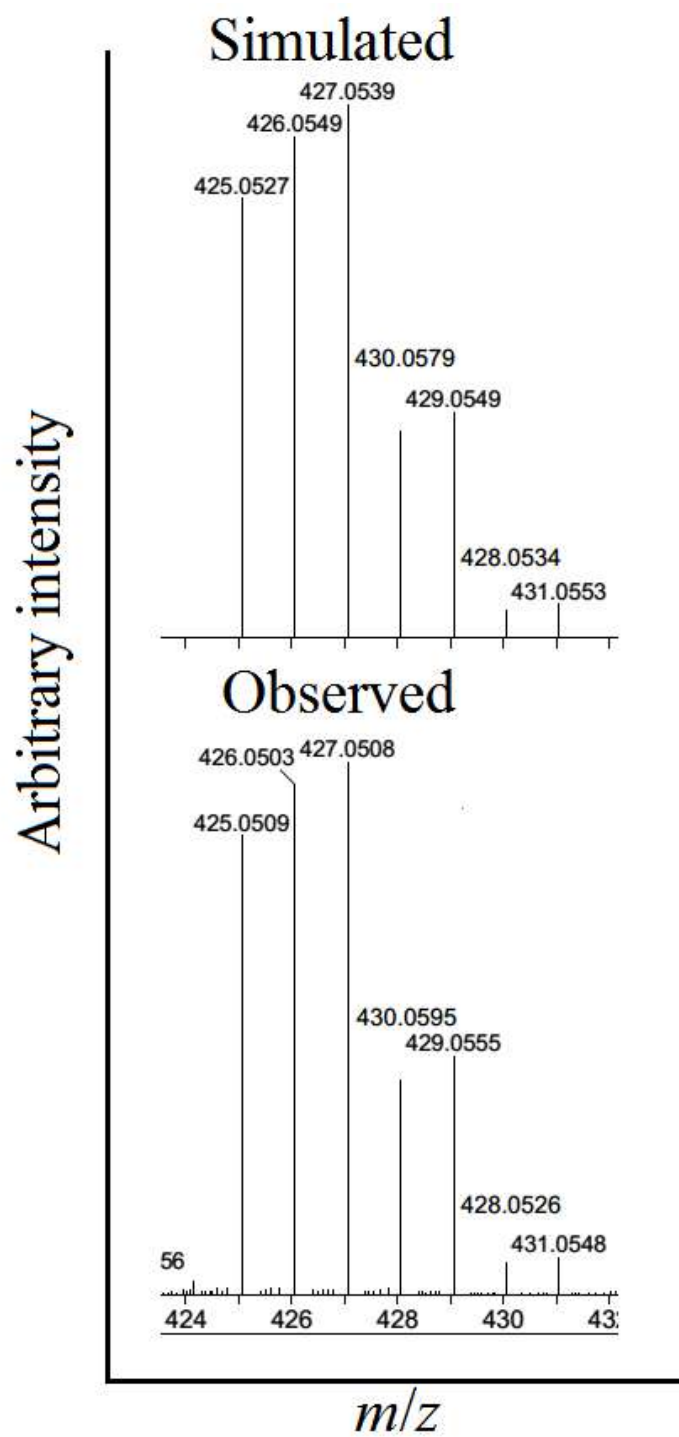

**Fig. S20** Observed and simulated isotopic pattern of [**1b** (Scheme 4) + H<sup>+</sup>] found in ESI-MS.

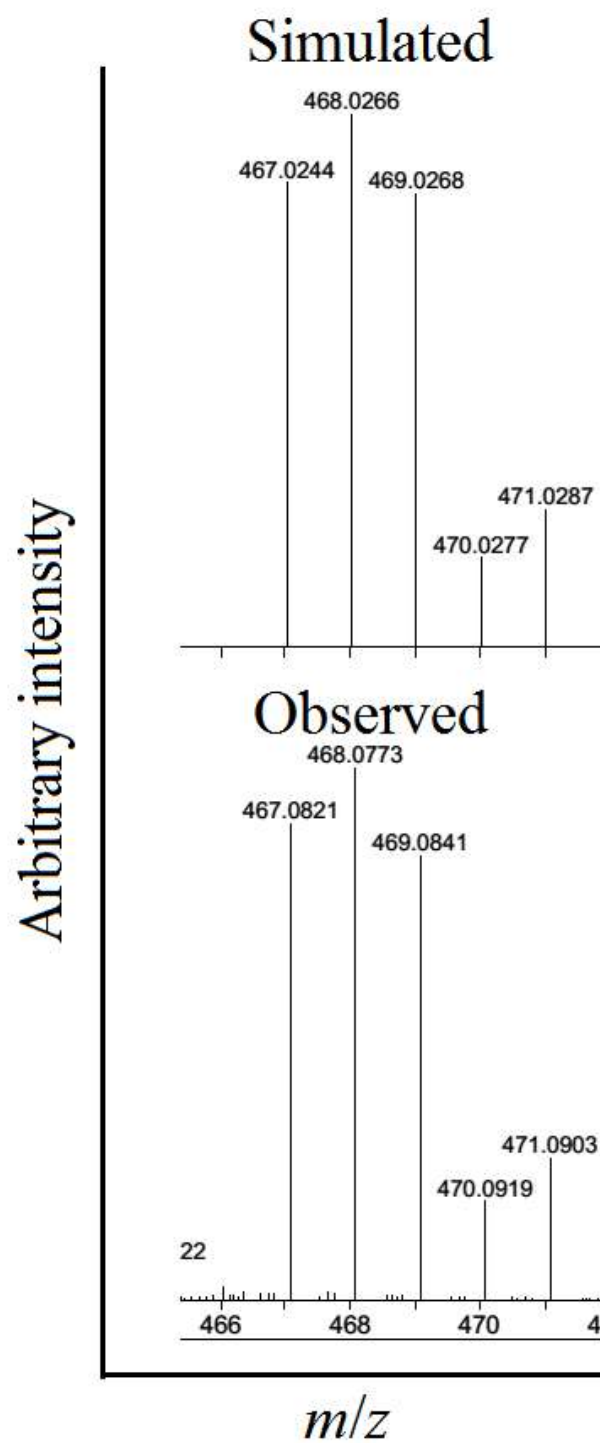

**Fig. S21** Observed and simulated isotopic pattern of  $[1\mathbf{c} \text{ (Scheme 4)} - 2\text{H}^+ + \text{Na}^+ + \text{K}^+]$  found in ESI-MS.

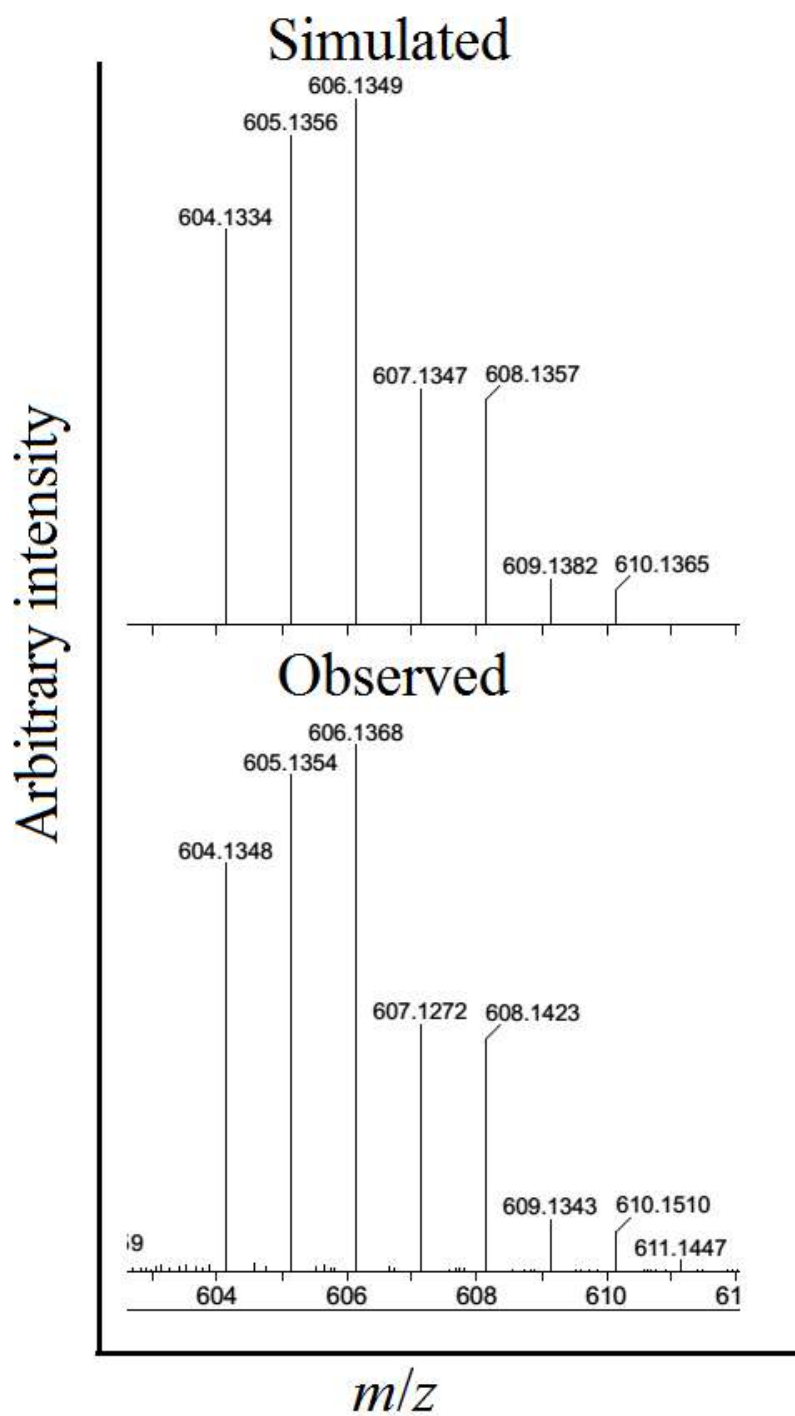

**Fig. S22** Observed and simulated isotopic pattern of [**1d** (Scheme 4)] found in ESI-MS.

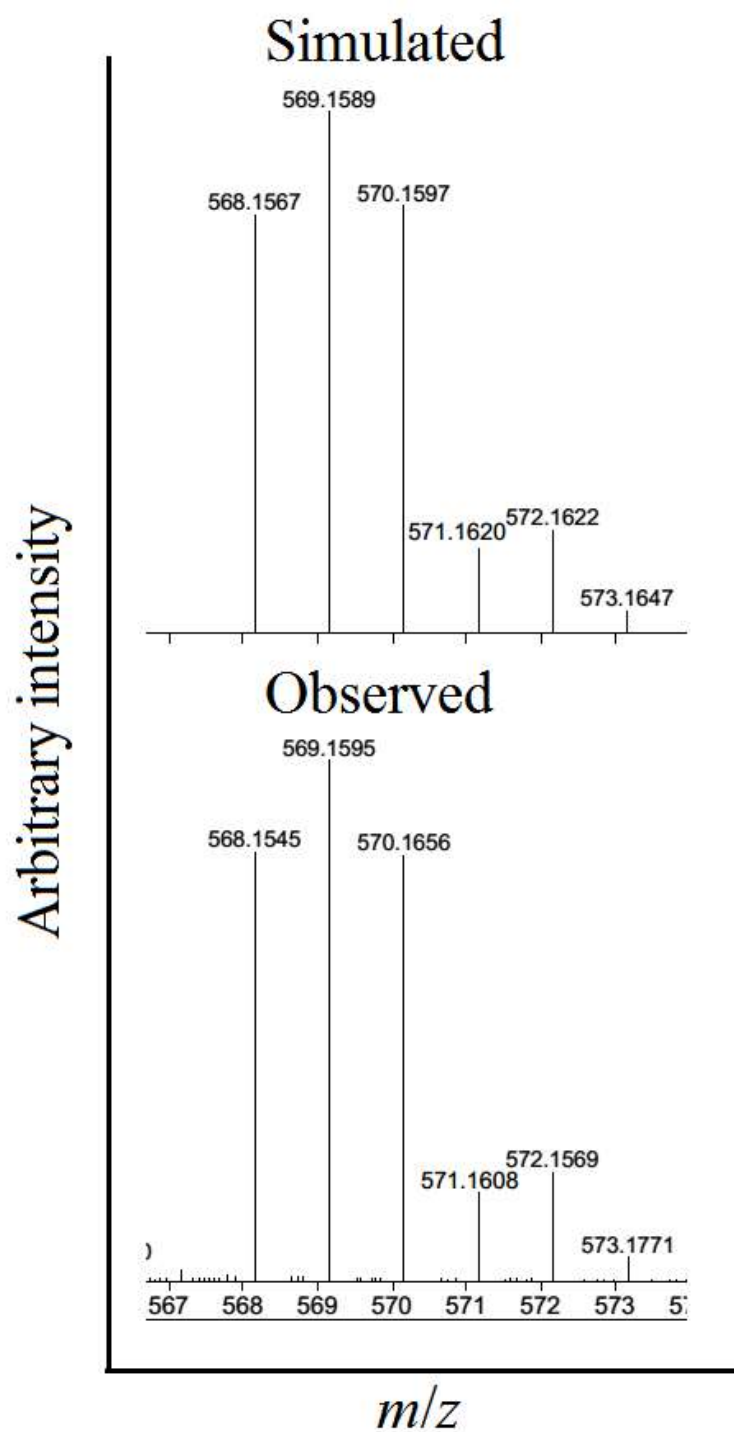

**Fig. S23** Observed and simulated isotopic pattern of [**1e** (Scheme 4)] found in ESI-MS.

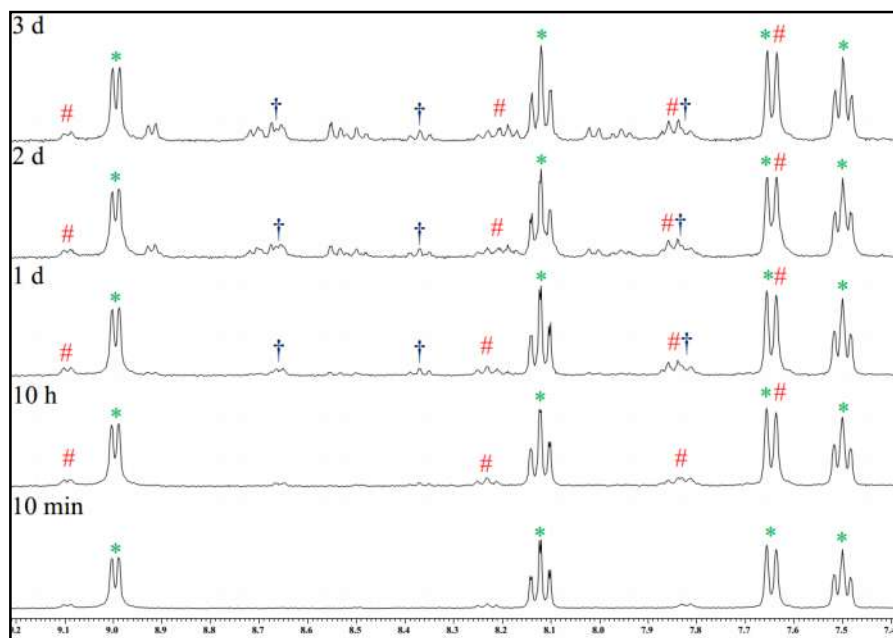

**Fig. S24** Stack plot of aromatic region during the stability kinetics study of complex **2** in 20% PBS (pD 7.4, prepared in D<sub>2</sub>O) – DMSO-*d*<sub>6</sub> mixture by <sup>1</sup>H NMR, where \*, # and † indicate the signals of intact complex **2**, hydrolyzed complex **2a** and aziridinium ion **2b** respectively.

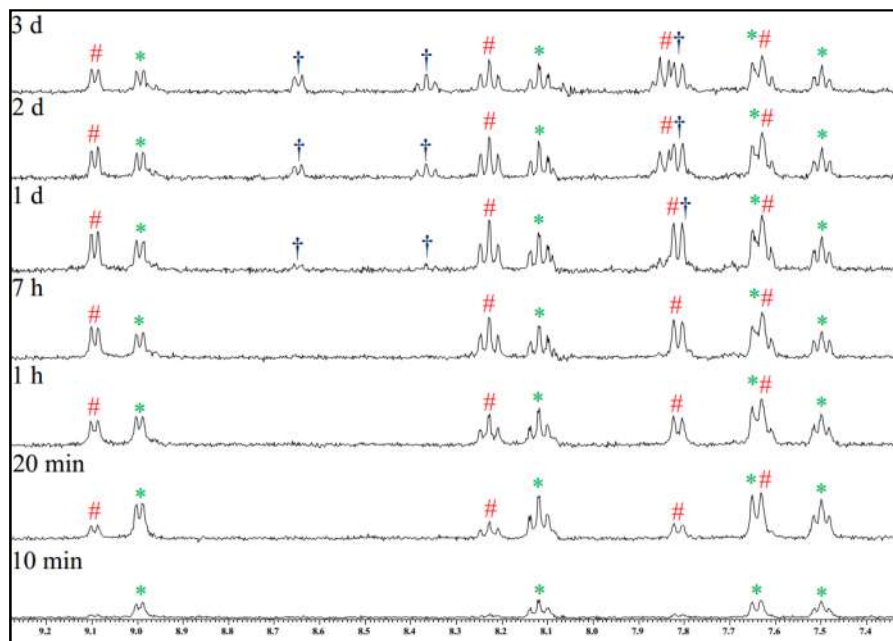

**Fig. S25** Stack plot of aromatic region during the stability kinetics study of complex **2** in 20% water – DMSO-*d*<sub>6</sub> mixture by <sup>1</sup>H NMR, where where \*, # and † indicate the signals of intact complex **2**, hydrolyzed complex **2a** and aziridinium ion **2b** respectively.

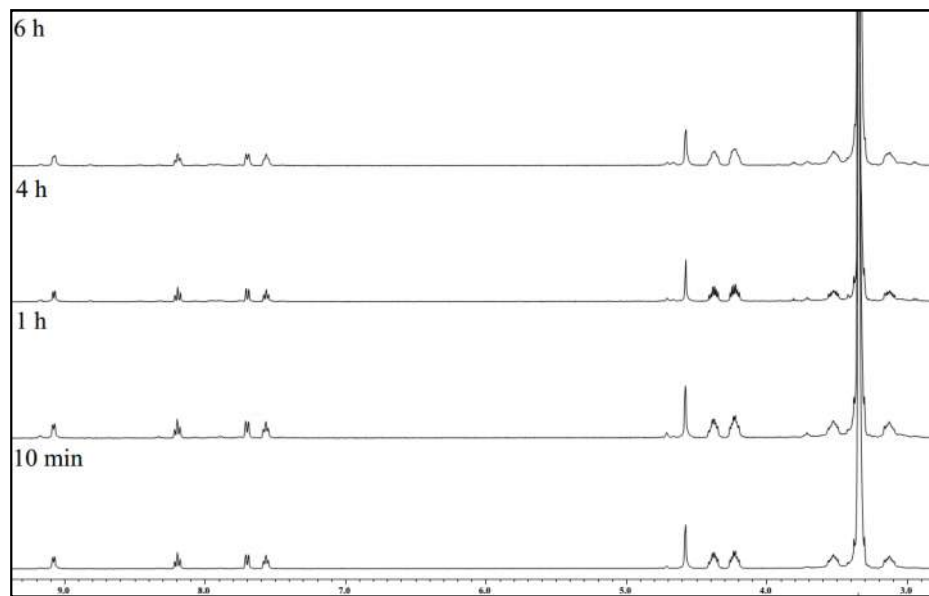

**Fig. S26** Stack plot of stability kinetics study of complex **2** in DMSO- $d_6$  by  $^1\text{H}$  NMR.

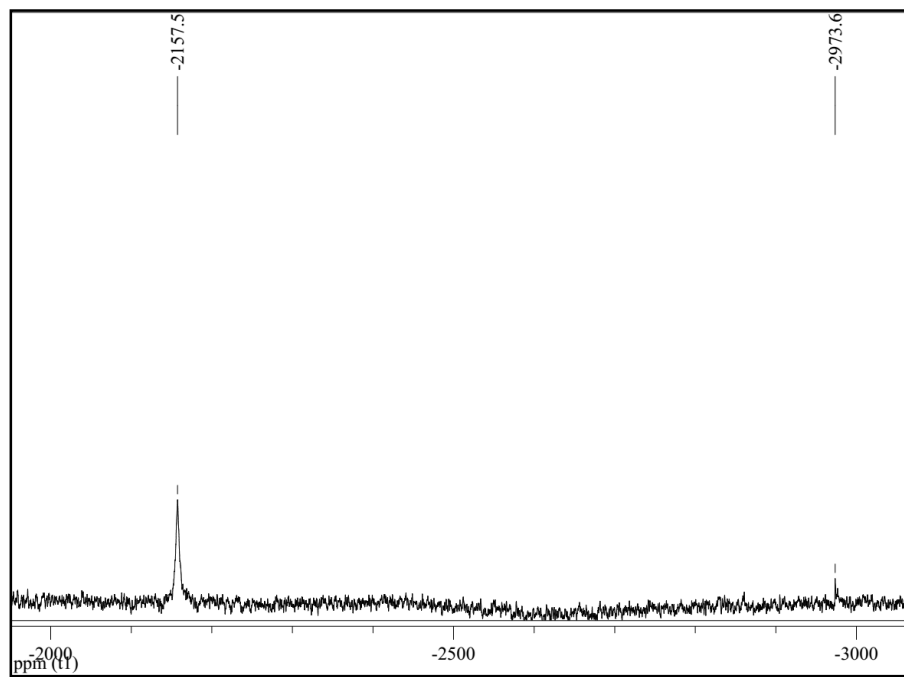

**Fig. S27**  $^{195}\text{Pt}$  NMR of complex **2** in DMSO- $d_6$  after 8 h where peak at  $-2157.5$  and  $-2973.6$  ppm represent the chemical shift of **2** and DMSO bound complex **2** respectively.



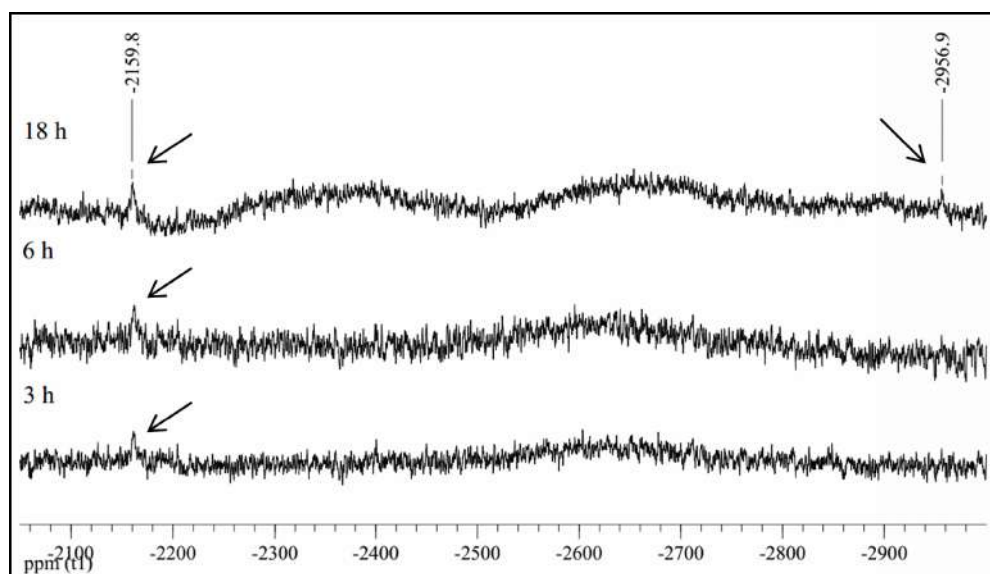

**Fig. S28** Stack plot of stability kinetics study of **2** (6 mM) in 40% DMEM-DMSO- $d_6$  by  $^{195}\text{Pt}$  NMR. The peak at  $-2159.8$  ppm is for intact complex **2** and peak at  $-2956.9$  may signify S-bonded **2**. During experimentation some amount of the native complex precipitated.

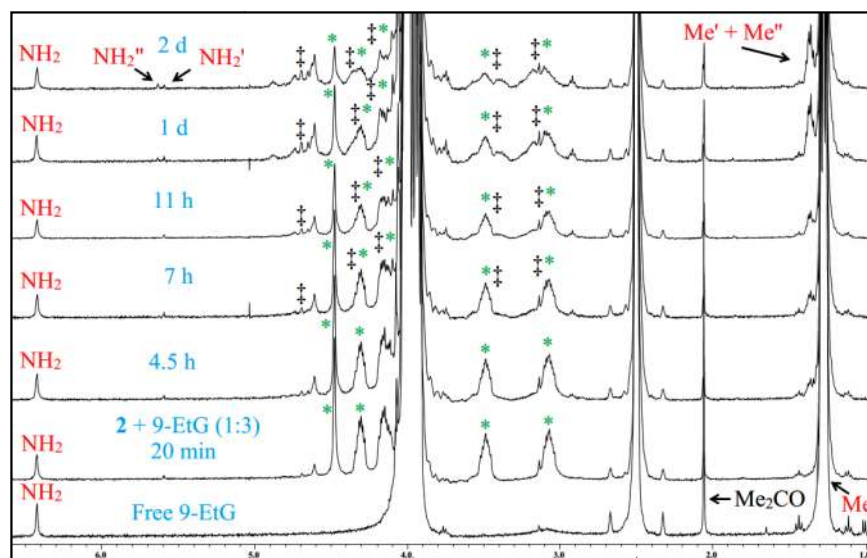

**Fig. S29** Stack plot of aliphatic region during the binding kinetics study of **2** with 9-EtG (1:3) in 20% PBS (pD 7.4, prepared in  $\text{D}_2\text{O}$ ) – DMSO- $d_6$  by  $^1\text{H}$  NMR, where \* and ‡ indicate the signals of intact complex **2** and 9-EtG bound complexes **2d** & **2e** respectively.  $\text{NH}_2$  of free 9-EtG is shifted upfield to  $\text{NH}_2'$  &  $\text{NH}_2''$  of 9-EtG bound complexes **2d** & **2e** respectively. **Me** of free 9-EtG is shifted downfield to **Me'** & **Me''** of 9-EtG bound complexes **2d** & **2e** respectively.

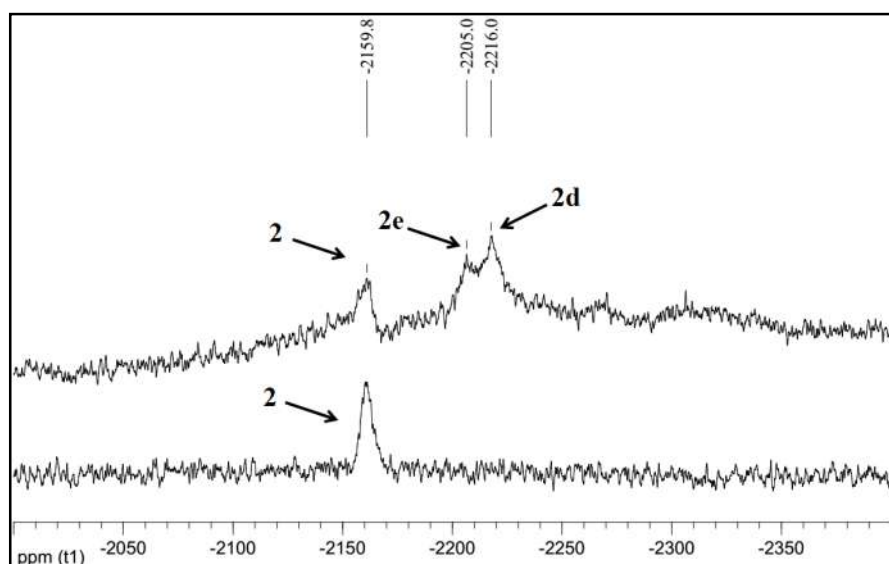

**Fig. S30** Stack plot of binding kinetics study of **2** with 9-EtG (1:3) in 20% PBS (pD 7.4, prepared in D<sub>2</sub>O) – DMSO-*d*<sub>6</sub> by <sup>195</sup>Pt NMR. The data taken after 2 h shows no binding of 9-EtG with **2**. After 24 h complex **2** signal at –2159.8 ppm diminished and two closely spaced signals of 9-EtG bound complexes **2d** & **2e** at –2216.0 & –2205.0 ppm respectively appear.

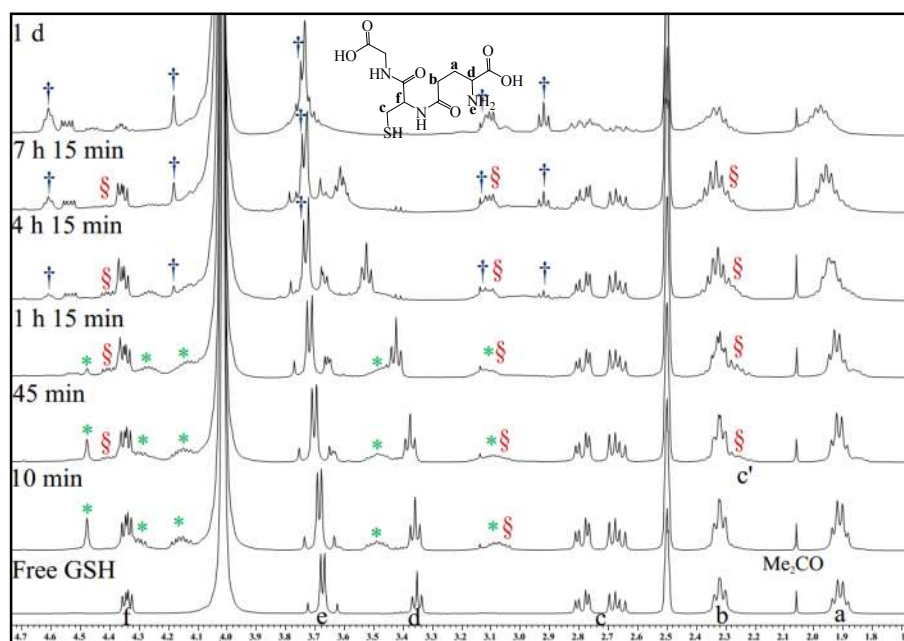

**Fig. S31** Stack plot of aliphatic region during the binding kinetics study of **2** with GSH in 20% PBS (pD 7.4, prepared in D<sub>2</sub>O) – DMSO-*d*<sub>6</sub> by <sup>1</sup>H NMR, where \*, § and † indicate the signals of intact complex **2**, GSH bound complex **2c** and aziridinium ion **2b** respectively.

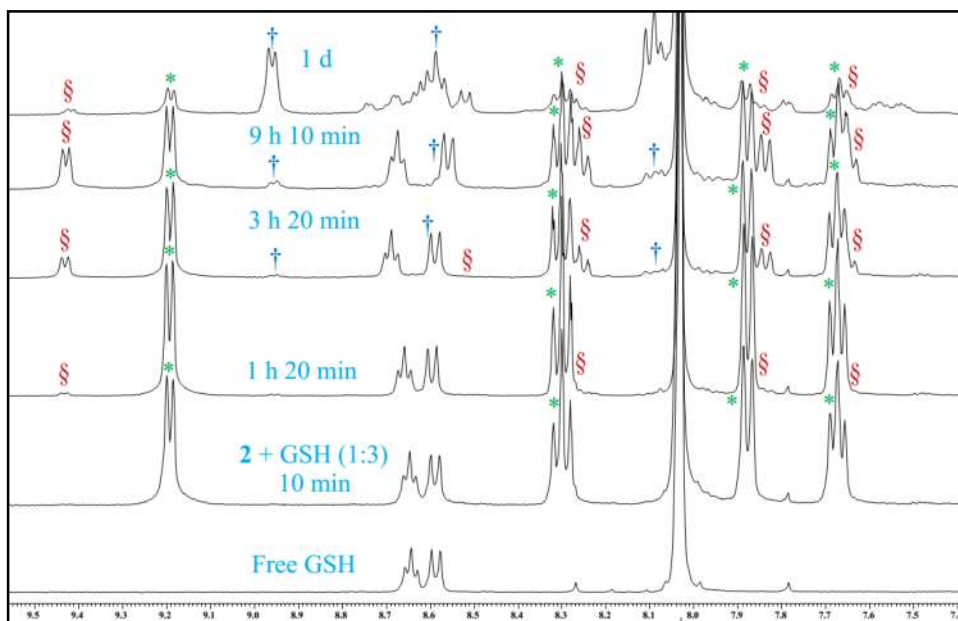

**Fig. S32** Stack plot of aromatic region during the binding kinetics study of **2** with GSH in 20% PBS (pD 7.4, prepared in D<sub>2</sub>O) – DMF-*d*<sub>7</sub> by <sup>1</sup>H NMR, where \*, § and † indicate the signals of intact complex **2**, GSH bound complex **2c** and aziridinium ion **2b** respectively.

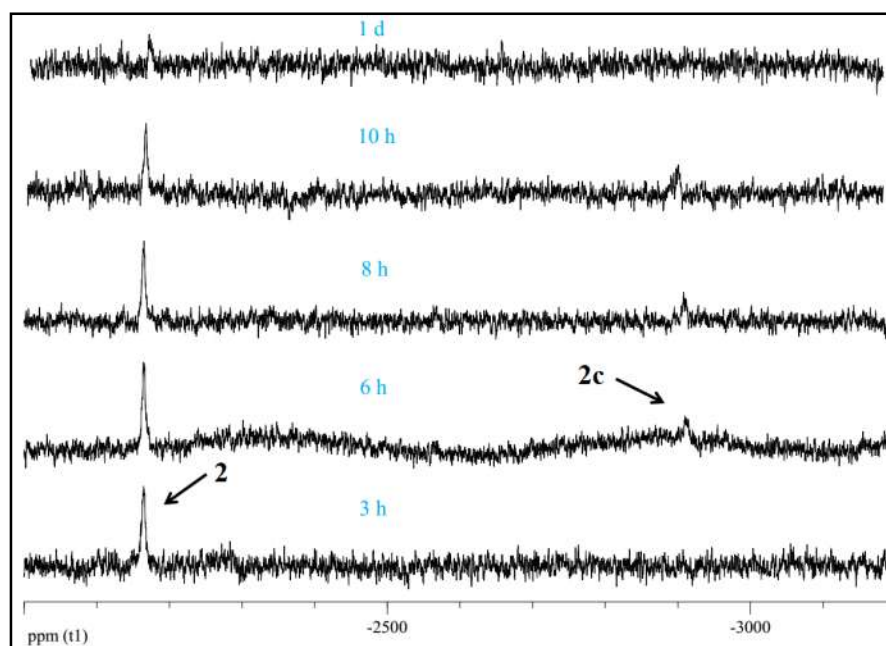

**Fig. S33** Stack plot of binding kinetics study of **2** with GSH (1:3) in 20% PBS (pD 7.4, prepared in D<sub>2</sub>O) – DMF-*d*<sub>7</sub> by <sup>195</sup>Pt NMR. After 6 h complex signal GSH bound complex **2c** at –2910.9 ppm appears along with initial signal of complex **2** at –2164.6 ppm. After a day the <sup>195</sup>Pt signal of **2c** vanishes with very small amount of unreacted complex **2** signal.

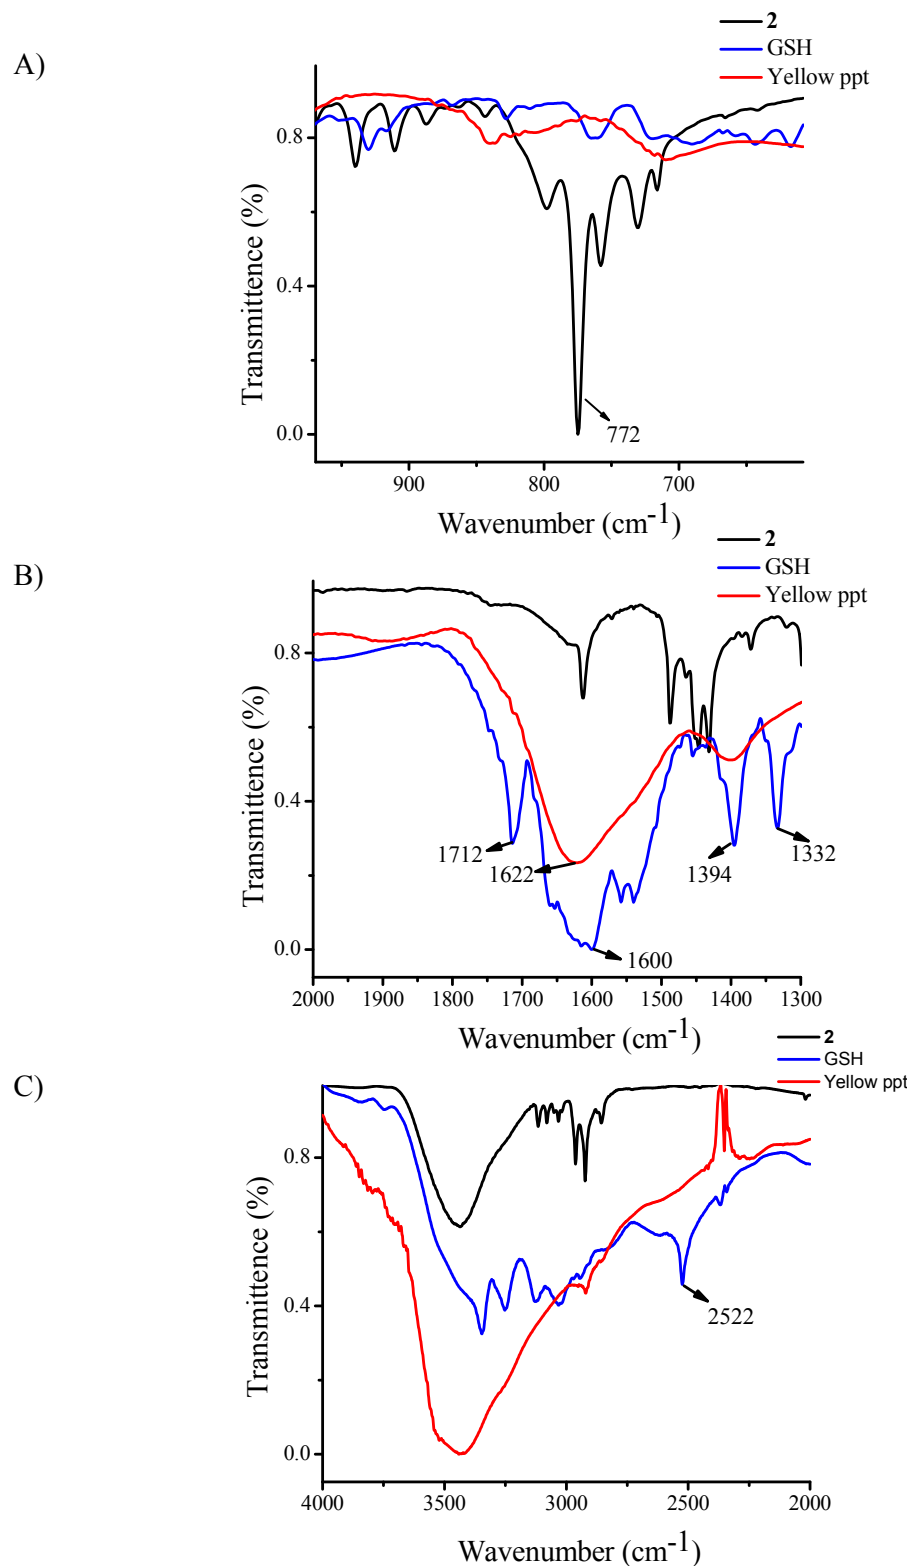

**Fig. S34** Stack plot of IR spectra of **2**, GSH and yellow ppt found in the reaction of **2** with GSH (1:3) in 20% PBS (pD 7.4, prepared in  $\text{D}_2\text{O}$ ) –  $\text{DMF-}d_7$ . A) Sharp band of C–Cl stretching frequency  $772\text{ cm}^{-1}$  of **2** vanished in yellow ppt. B) Carbonyl stretching band of GSH and yellow ppt. C) S–H stretching band at  $2522\text{ cm}^{-1}$  in GSH vanished in yellow ppt and a broad band at  $3550\text{--}2700\text{ cm}^{-1}$  for polymeric nature of yellow ppt.

**Table S3** Species found in ESI-MS during the stability/binding kinetics studies of **2** by  $^1\text{H}$  NMR. The drawings of the respective species are given below the tabulated data

| Species no. | $m/z_{\text{calc}}$ | Experiments                                    |                                                                 |                                                              |                                                               |
|-------------|---------------------|------------------------------------------------|-----------------------------------------------------------------|--------------------------------------------------------------|---------------------------------------------------------------|
|             |                     | <b>2</b> in 20%<br>PBS in<br>$\text{DMSO-}d_6$ | <b>2</b> in 20%<br>$\text{H}_2\text{O}$ in<br>$\text{DMSO-}d_6$ | <b>2</b> + 9-EtG (1:3) in<br>20% PBS in<br>$\text{DMSO-}d_6$ | <b>2</b> + GSH<br>(1:3) in 20%<br>PBS in<br>$\text{DMSO-}d_6$ |
|             |                     | $m/z_{\text{obs}}$                             |                                                                 |                                                              |                                                               |
| II-a        | 197.0845            | 197.0846                                       | 197.0832                                                        | -                                                            | 197.0832                                                      |
| II-b        | 463.0297            | 462.9756                                       | 462.9728                                                        | 462.9782                                                     | 462.9832                                                      |
| II-c        | 520.9429            | 520.9438                                       | 520.9869                                                        | 520.9448                                                     | 520.9427                                                      |
| II-d        | 540.9330            | 540.9924                                       | 540.9805                                                        | 540.9927                                                     | -                                                             |
| II-e        | 606.0896            | -                                              | -                                                               | 606.0881                                                     | -                                                             |
| II-f        | 642.0657            | -                                              | -                                                               | 642.0645                                                     | -                                                             |
| II-g        | 179.1184            | -                                              | -                                                               | -                                                            | 179.0498                                                      |
| II-h        | 233.0612            | -                                              | -                                                               | -                                                            | 233.0599                                                      |
| II-i        | 308.0916            | -                                              | -                                                               | -                                                            | 308.0837                                                      |
| II-j        | 330.0736            | -                                              | -                                                               | -                                                            | 330.0706                                                      |
| II-k        | 352.0555            | -                                              | -                                                               | -                                                            | 352.0511                                                      |
| II-l        | 374.0375            | -                                              | -                                                               | -                                                            | 374.0371                                                      |
| II-m        | 734.0927            | -                                              | -                                                               | -                                                            | 734.1046                                                      |
| II-n        | 770.0688            | -                                              | -                                                               | -                                                            | 770.0684                                                      |
| II-o        | 792.0508            | -                                              | -                                                               | -                                                            | 792.0432                                                      |
| II-p        | 814.0327            | -                                              | -                                                               | -                                                            | 814.0229                                                      |
| II-q        | 836.0146            | -                                              | -                                                               | -                                                            | 836.0093                                                      |
| I-b         | 427.0539            | 427.0096                                       | 427.0059                                                        | 427.0033                                                     | -                                                             |
| I-f         | 180.0885            | -                                              | 180.0859                                                        | 180.0859                                                     | -                                                             |
| I-g         | 202.0705            | -                                              | 211.0636                                                        | 211.0636                                                     | -                                                             |
| I-h         | 218.0444            | -                                              | 218.0458                                                        | 218.0458                                                     | -                                                             |
| I-i         | 381.1512            | -                                              | -                                                               | 381.1545                                                     | -                                                             |
| I-l         | 739.3126            | -                                              | -                                                               | 739.3130                                                     | -                                                             |

  

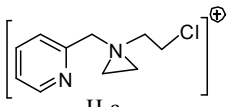

II-a



II-b



II-c



II-d



II-e



II-f

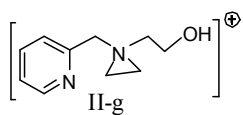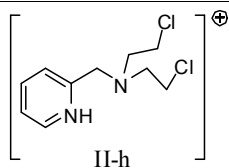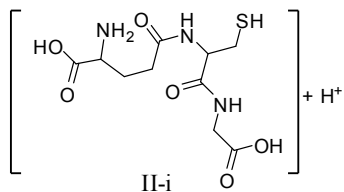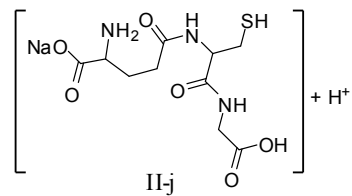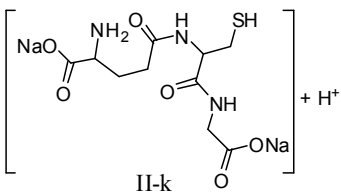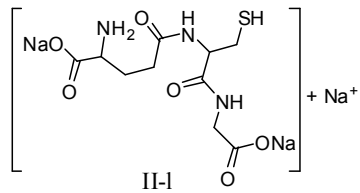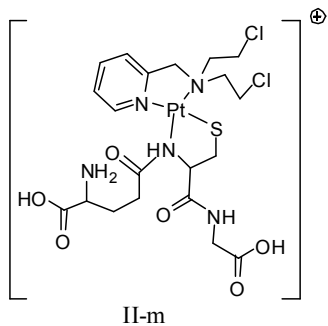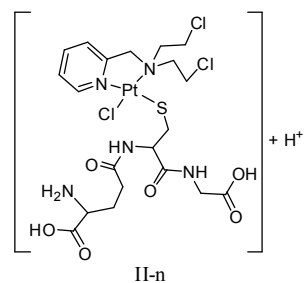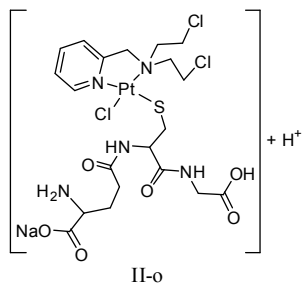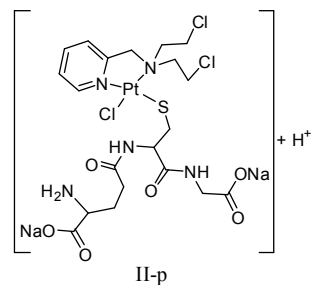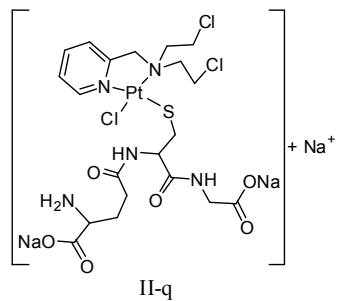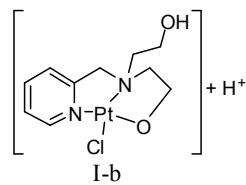

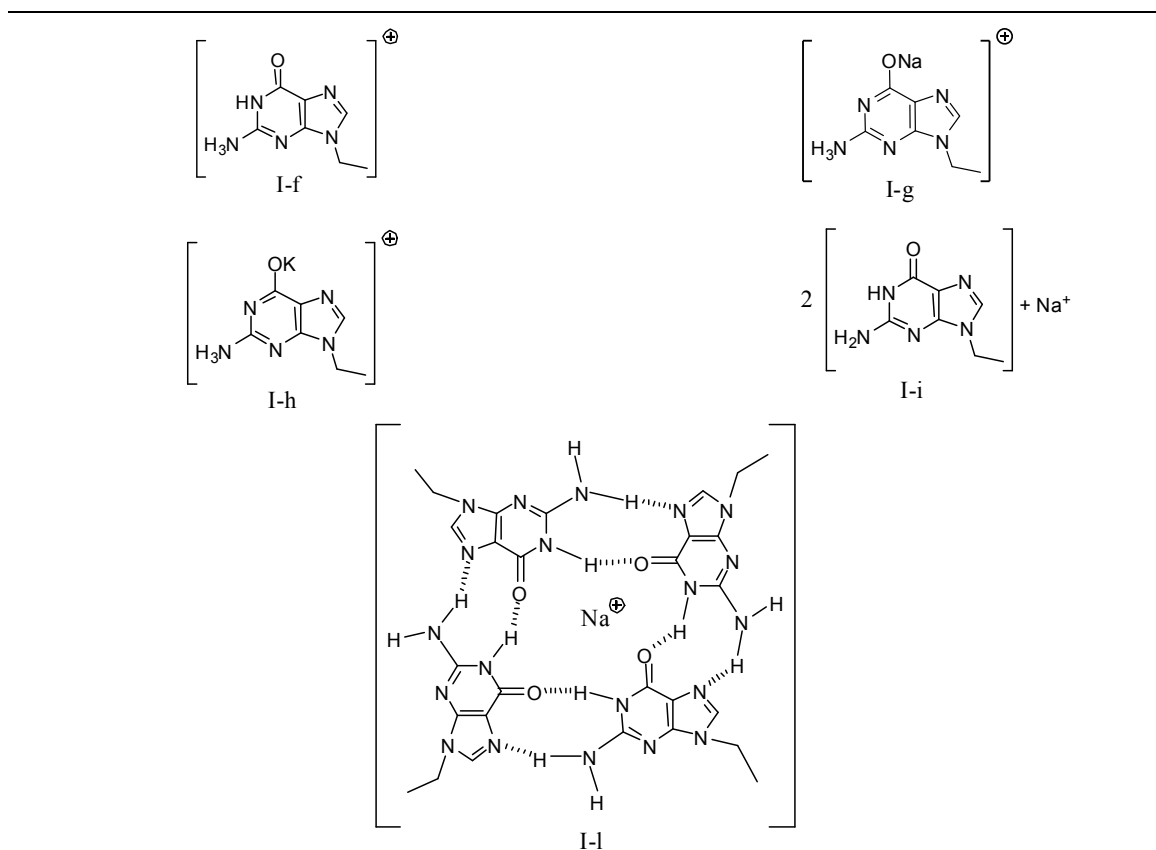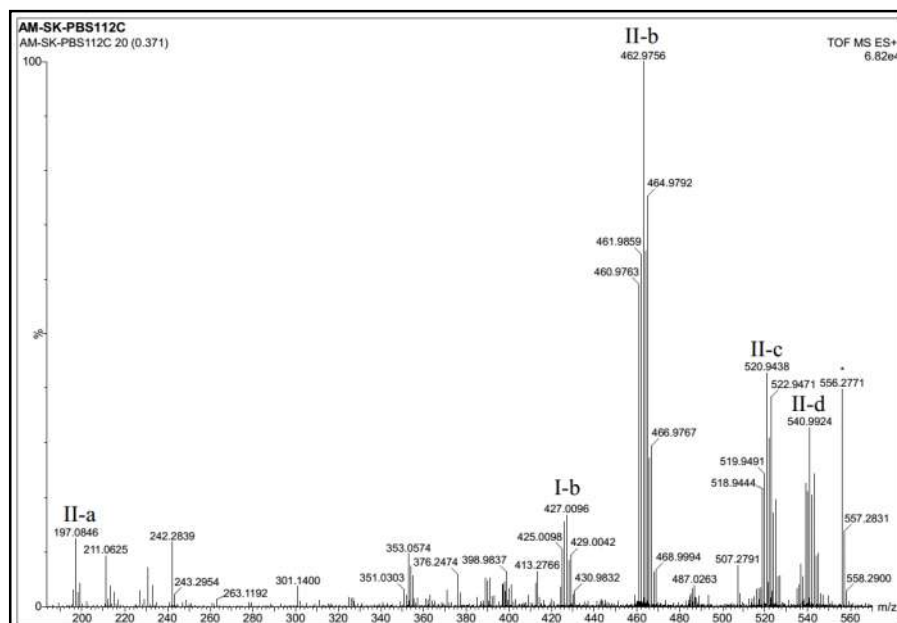

**Fig. S35** ESI-MS speciation recorded during monitoring of stability kinetics of the complex **2** by  $^1\text{H}$  NMR after 1 d in 20% PBS (pD 7.4, prepared in  $\text{D}_2\text{O}$ ) –  $\text{DMSO-}d_6$  mixture.

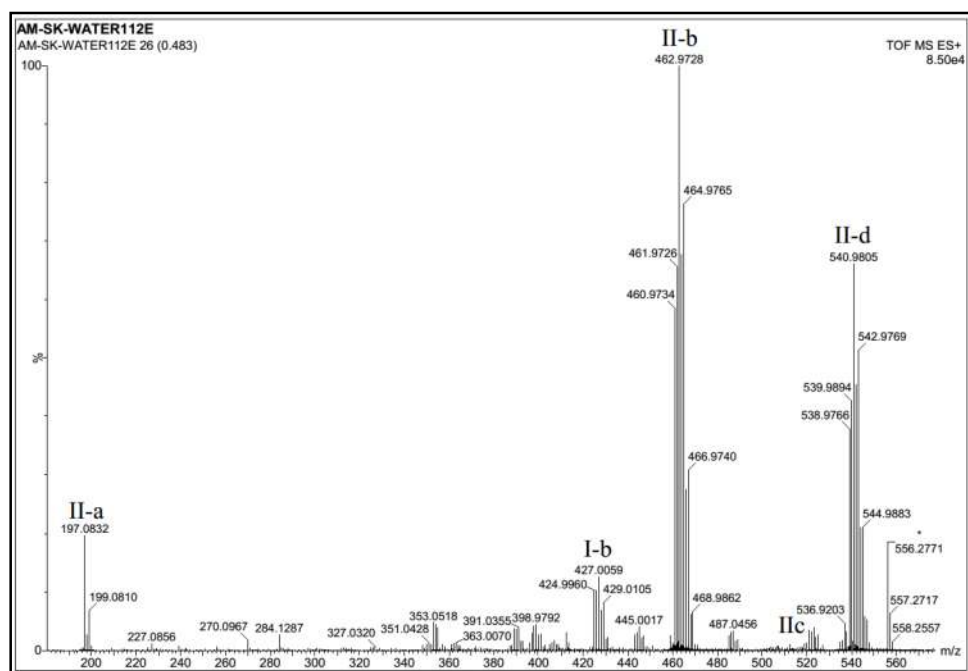

**Fig. S36** ESI MS speciation recorded during monitoring of stability kinetics of the complex **2** by  $^1\text{H}$  NMR after 3 d in 20% water –  $\text{DMSO}-d_6$  mixture.

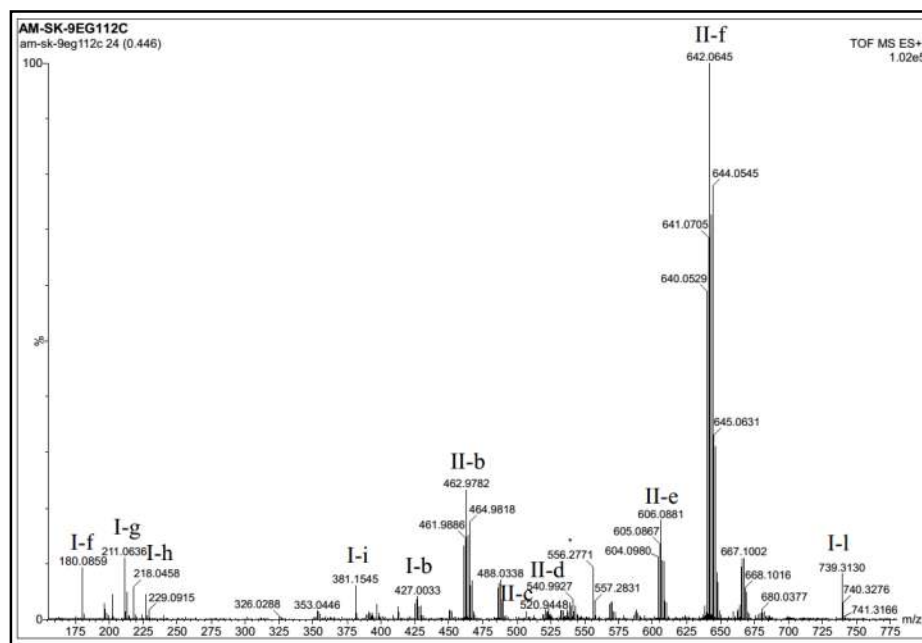

**Fig. S37** ESI-MS speciation recorded during monitoring of the 9-EtG binding kinetics with complex **2** by  $^1\text{H}$  NMR after 2 d in 20% PBS (pD 7.4, prepared in  $\text{D}_2\text{O}$ ) –  $\text{DMSO}-d_6$  mixture.



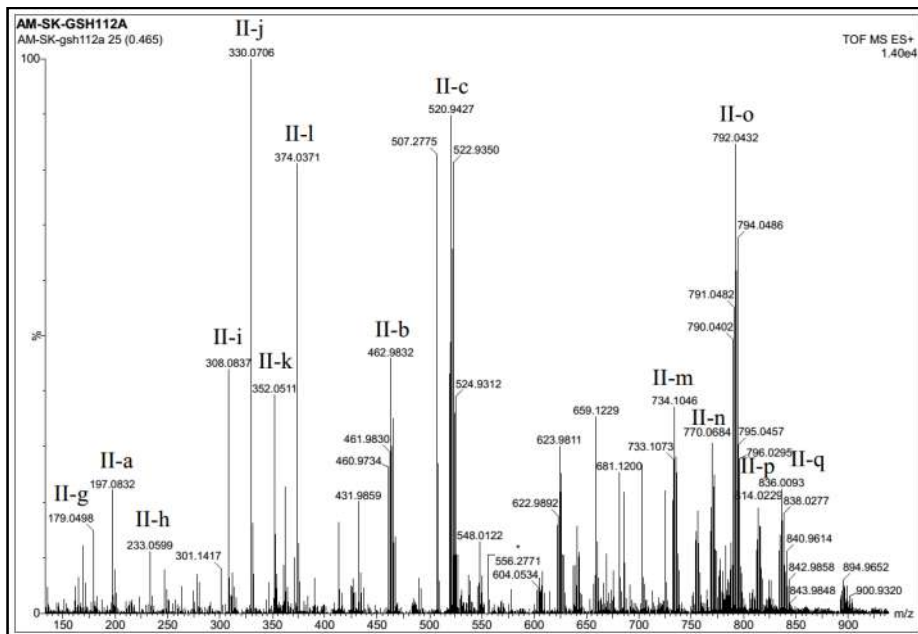

**Fig. S38** ESI-MS speciation recorded during monitoring of the GSH binding kinetics with complex **2** by  $^1\text{H}$  NMR after 2 h in 20% PBS (pD 7.4, prepared in  $\text{D}_2\text{O}$ ) –  $\text{DMSO-}d_6$  mixture.

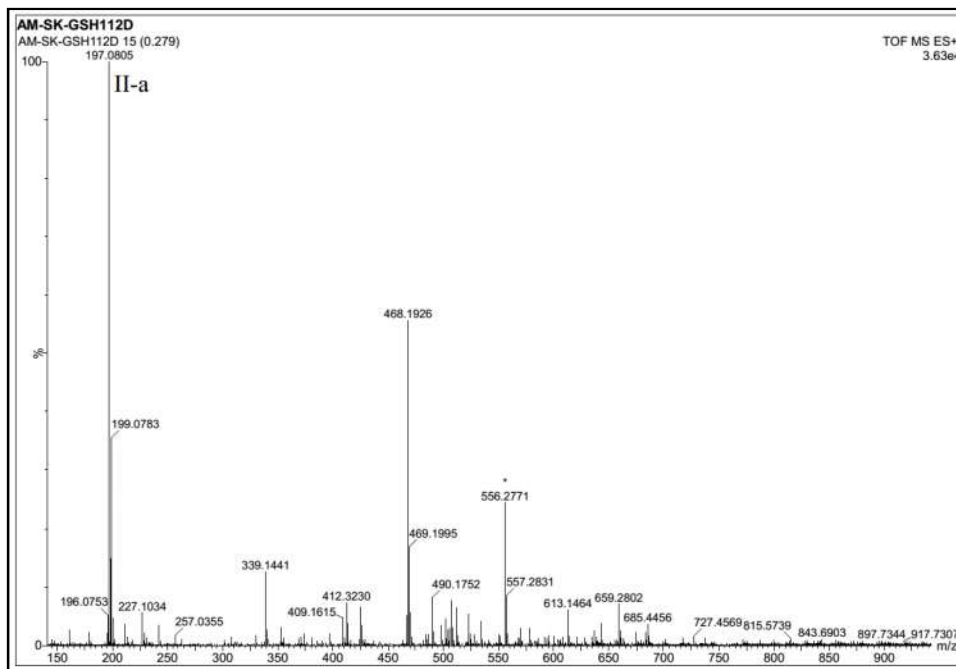

**Fig. S39** ESI-MS speciation recorded during monitoring of the GSH binding kinetics with complex **2** by  $^1\text{H}$  NMR after 1 d in 20% PBS (pD 7.4, prepared in  $\text{D}_2\text{O}$ ) –  $\text{DMSO-}d_6$  mixture.

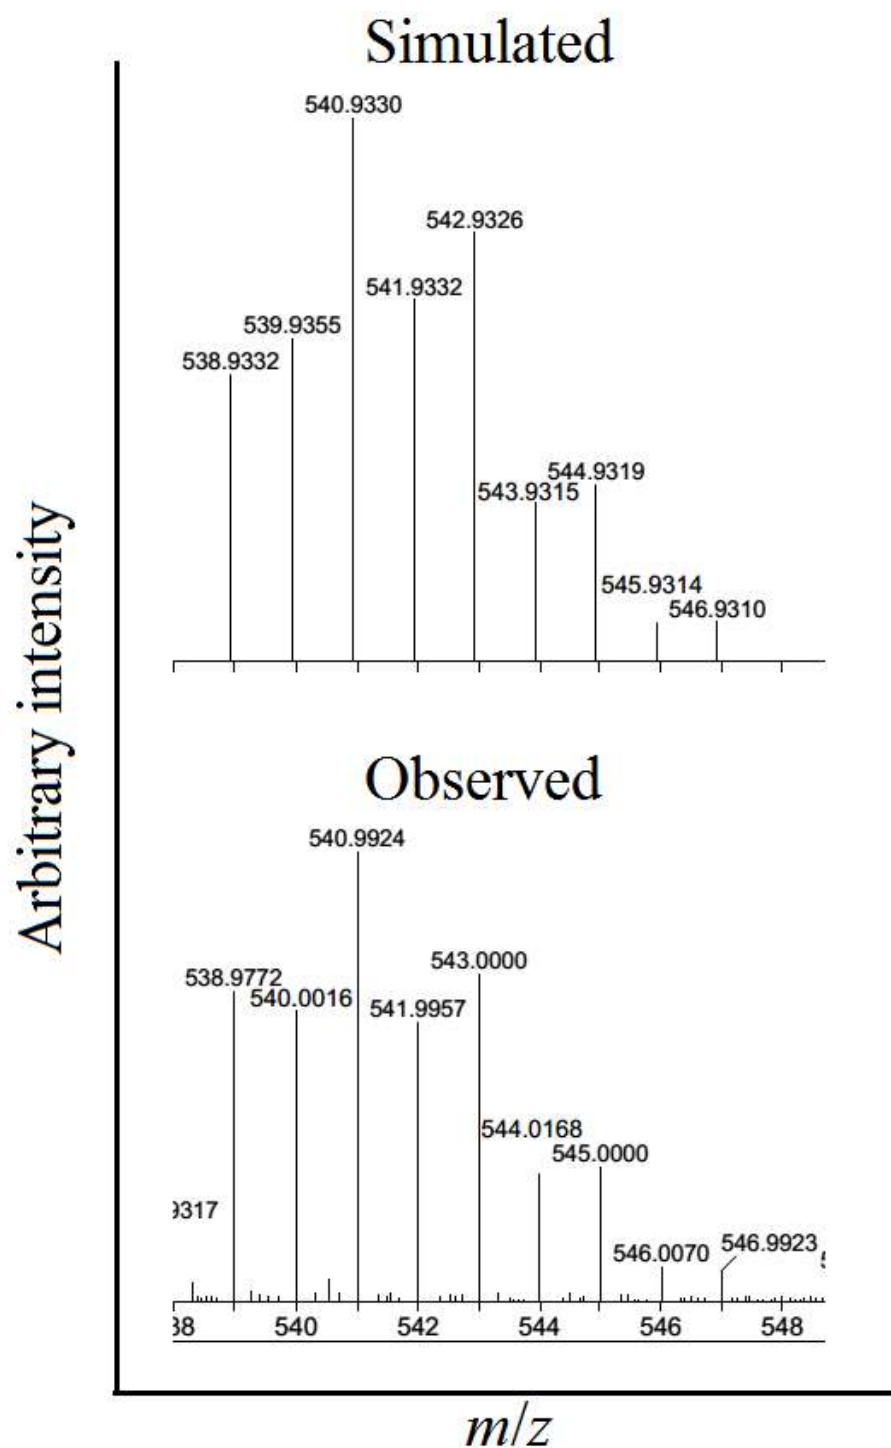

**Fig. S40** Observed and simulated isotopic pattern of [**2a** (Scheme 5) – 2H<sup>+</sup> + Na<sup>+</sup> + K<sup>+</sup>] found in ESI-MS.

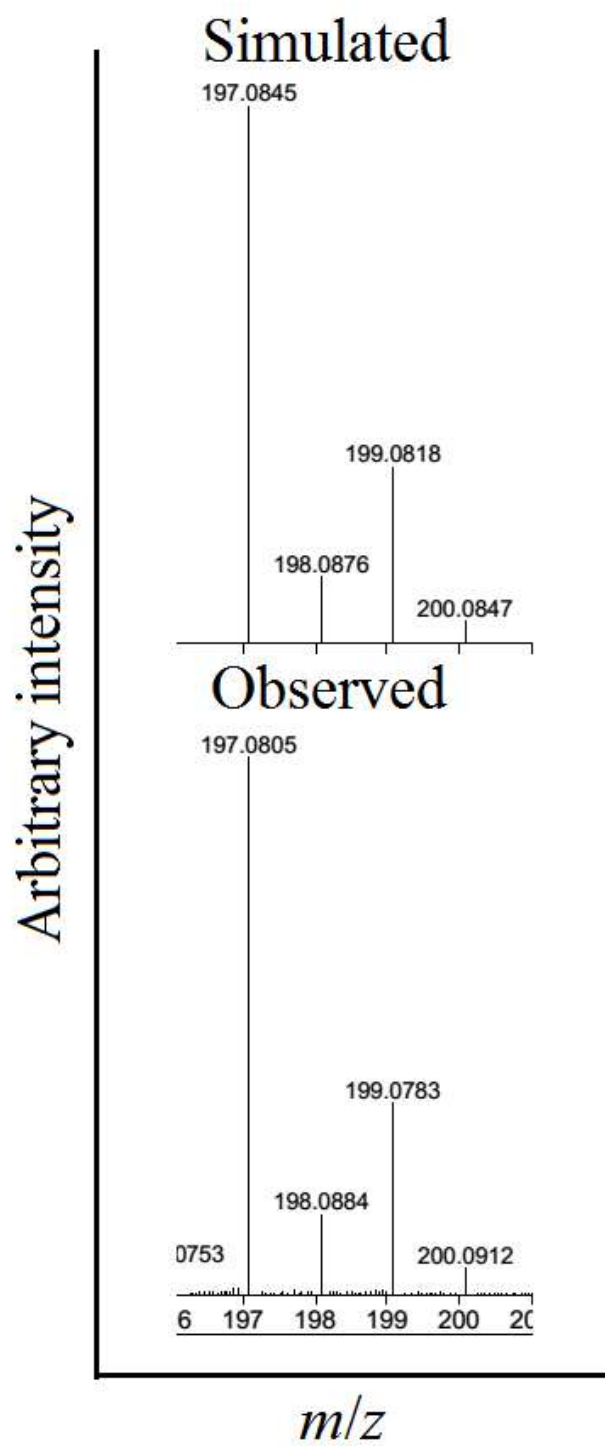

**Fig. S41** Observed and simulated isotopic pattern of [**2b** (Scheme 5)] found in ESI-MS.

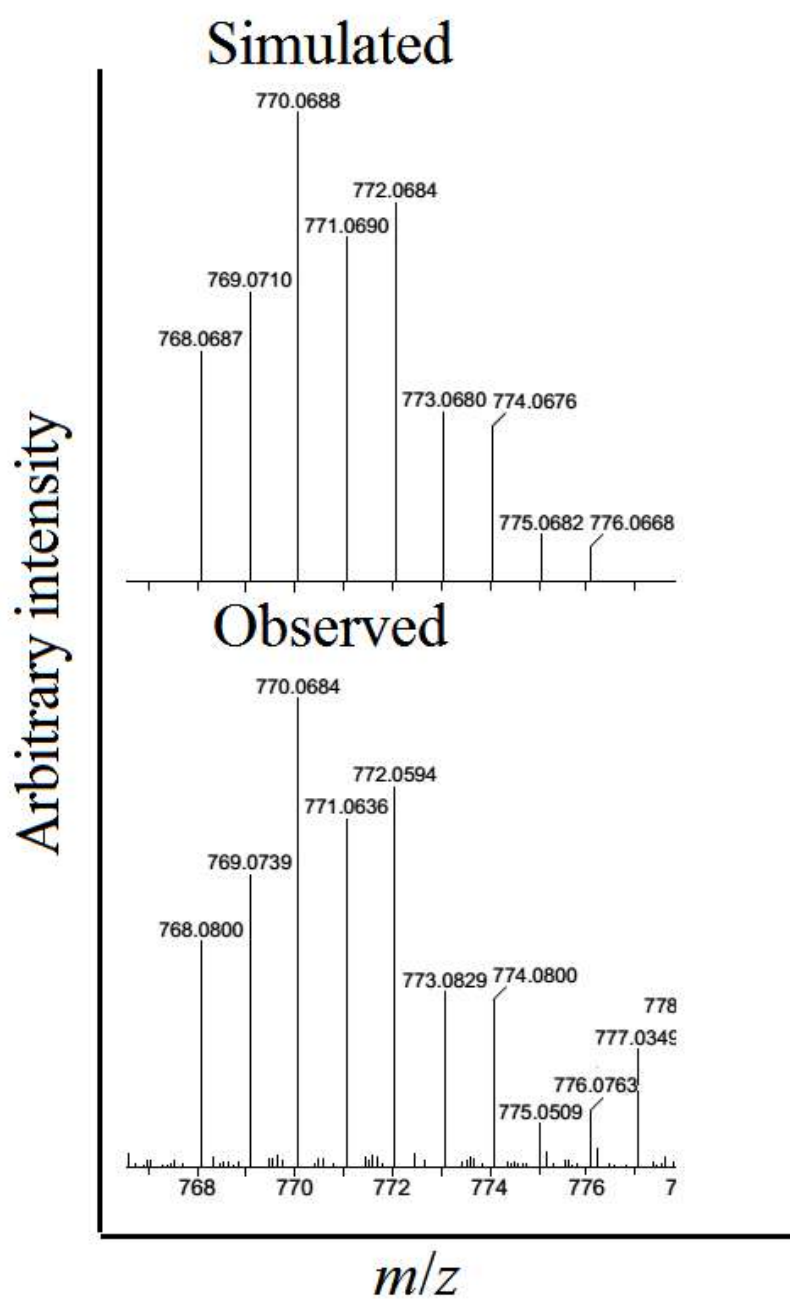

**Fig. S42** Observed and simulated isotopic pattern of [**2c** (Scheme 5)] found in ESI-MS.

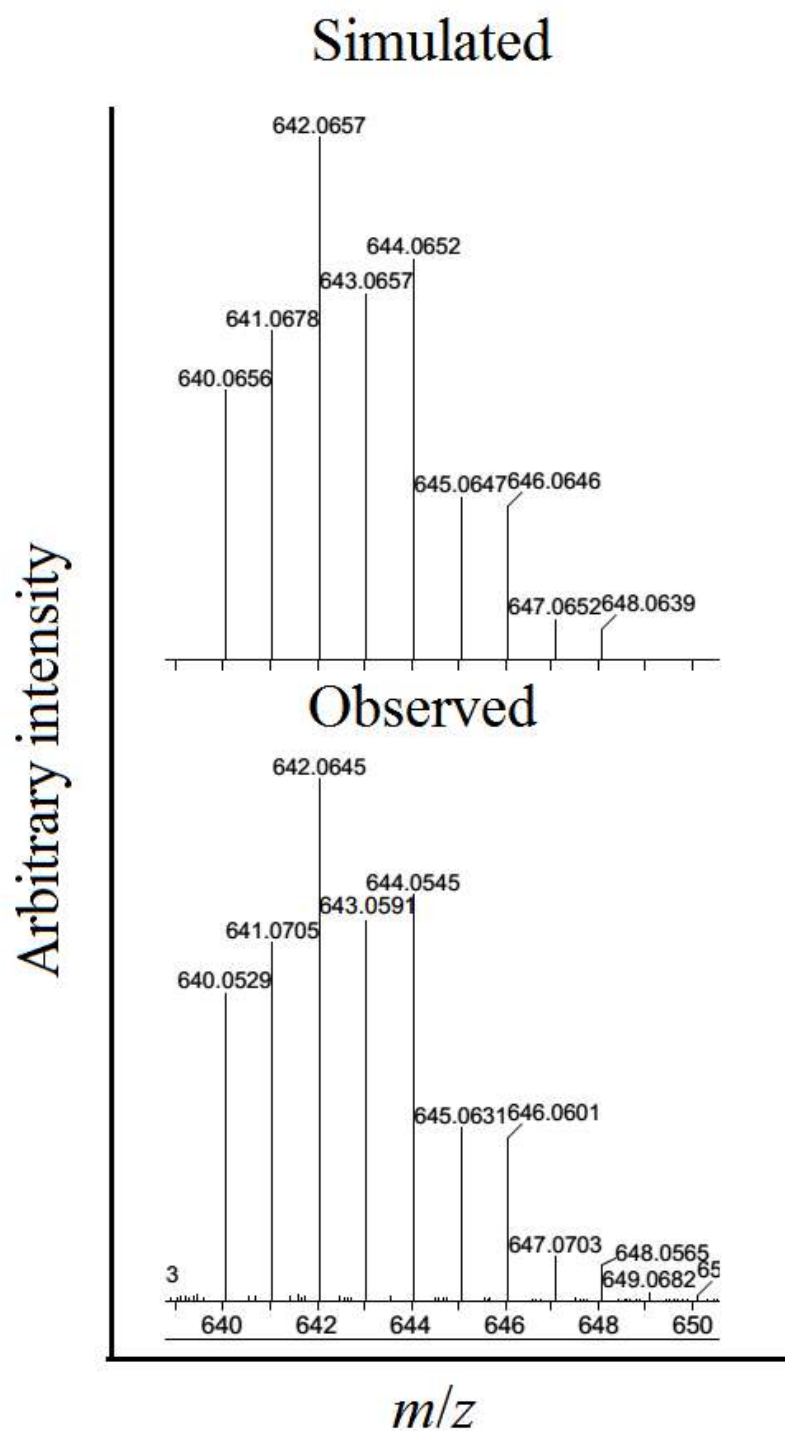

**Fig. S43** Observed and simulated isotopic pattern of [**2d** (Scheme 5)] found in ESI-MS.

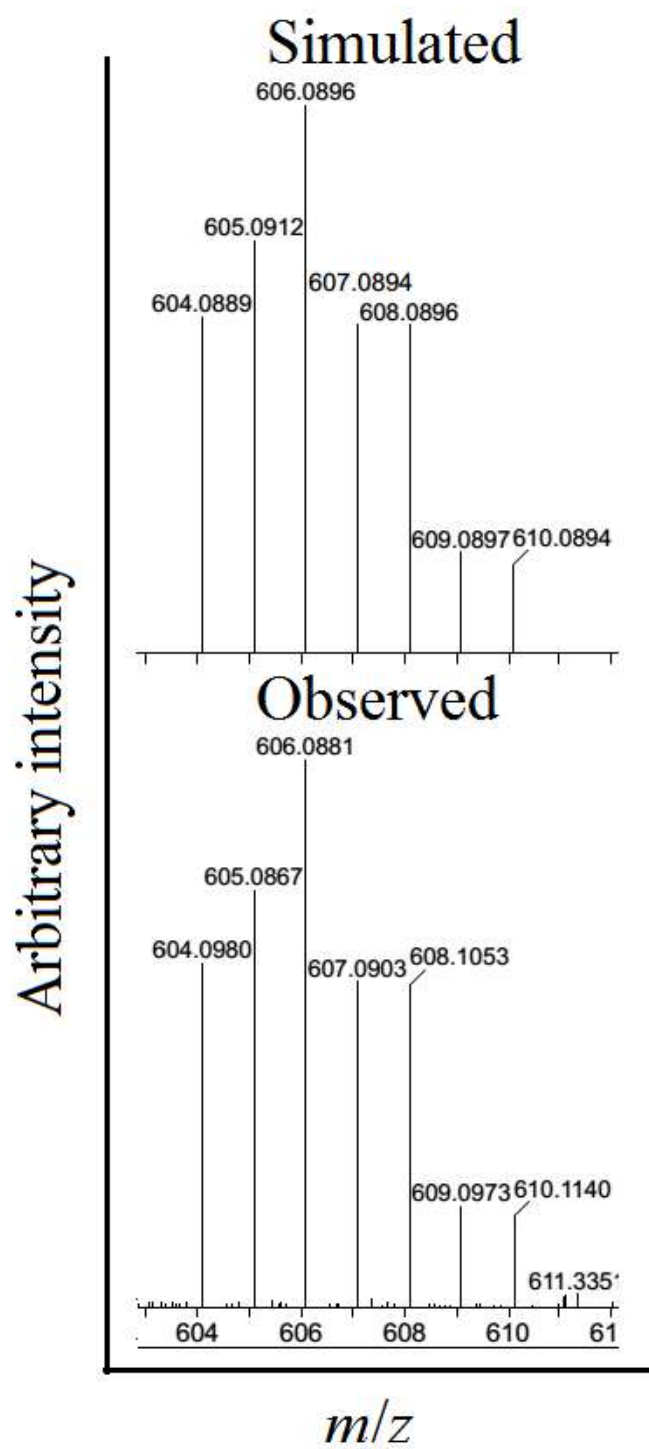

**Fig. S44** Observed and simulated isotopic pattern of [**2e** (Scheme 5)] found in ESI-MS.

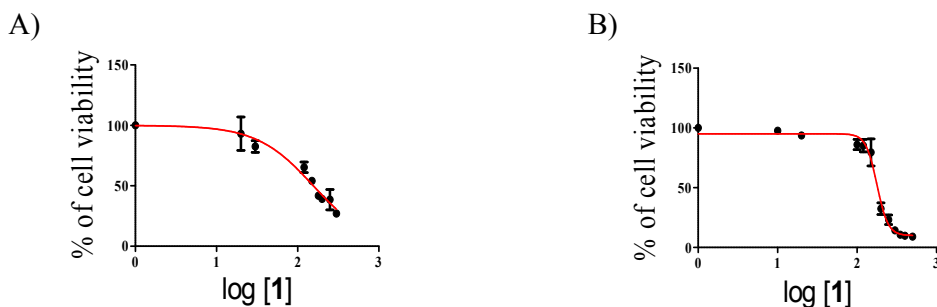

**Fig. S45** Plots of cell viability (%) vs. log of  $\mu\text{M}$  concentrations of **1** against A) MCF-7 and B) HeLa WT cell lines after incubation for 48 h determined from MTT assays under normoxic condition. The plots provided are for one independent experiment out of the three independent experiments.

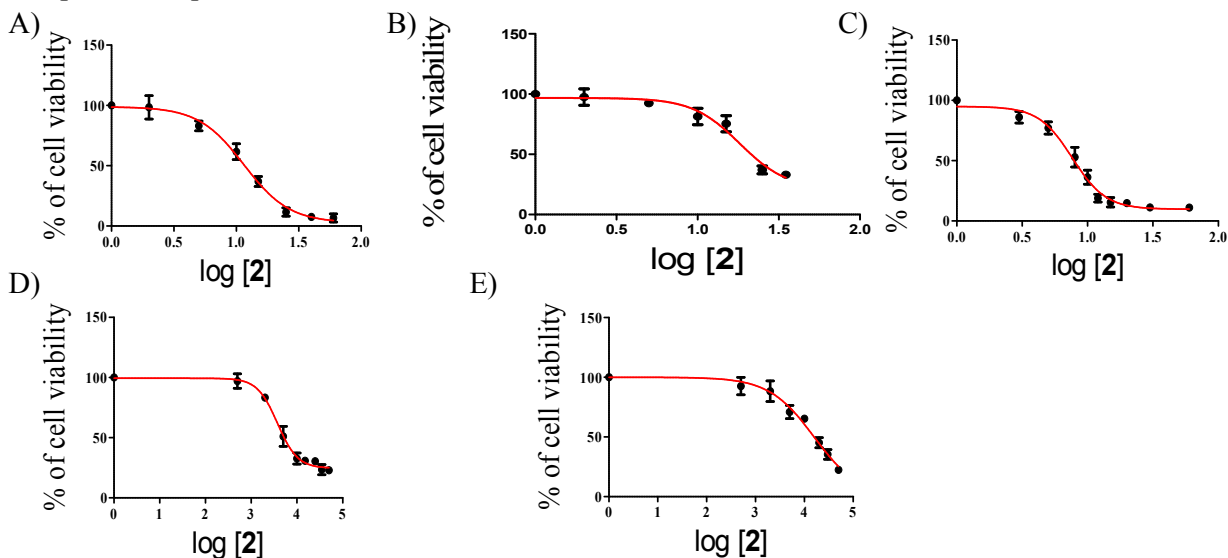

**Fig. S46** Plots of cell viability (%) vs. log of  $\mu\text{M}$  concentrations of **2** against A) MCF-7, B) A549, C) HeLa WT, D) MIA PaCa2 and E) HEK293 cell lines after incubation for 48 h determined from MTT assays under normoxic condition. The plots provided are for one independent experiment out of the three independent experiments.

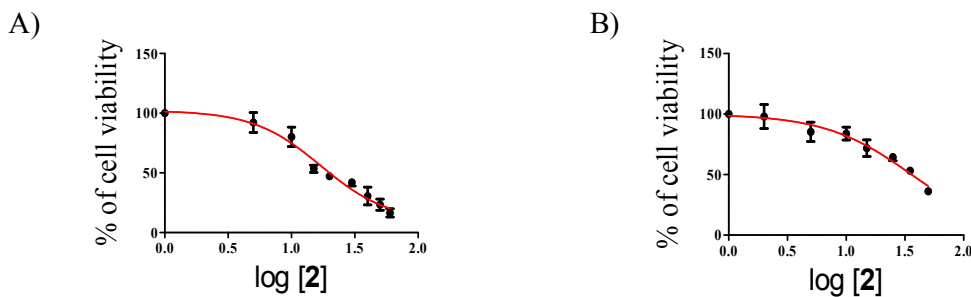

**Fig. S47** Plots of cell viability (%) vs. log of  $\mu\text{M}$  concentrations of **2** against A) MCF-7 and B) A549 cell lines after incubation for 48 h determined from MTT assays under normoxic condition in presence of 250  $\mu\text{M}$  and 400  $\mu\text{M}$  GSH respectively. The plots provided are for one independent experiment out of the three independent experiments.

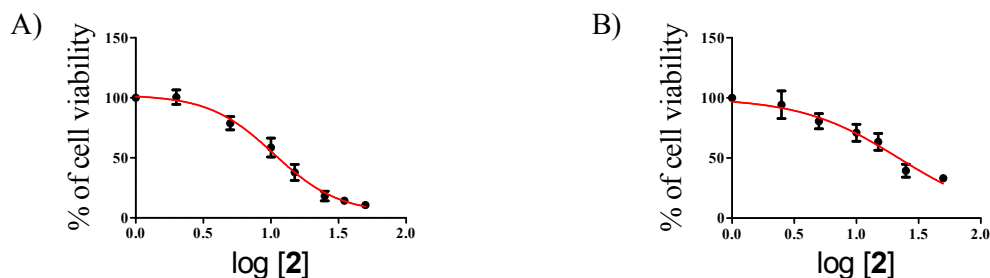

**Fig. S48** Plots of cell viability (%) vs. log of  $\mu\text{M}$  concentrations of **2** against A) MCF-7 and B) A549 cell lines after incubation for 48 h determined from MTT assays under hypoxic condition. The plots provided are for one independent experiment out of the three independent experiments.

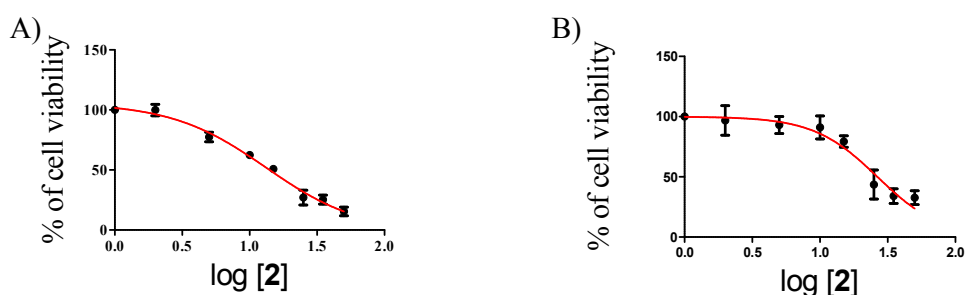

**Fig. S49** Plots of cell viability (%) vs. log of  $\mu\text{M}$  concentrations of **2** against A) MCF-7 and B) A549 cell lines after incubation for 48 h determined from MTT assays under hypoxic condition in presence of 250  $\mu\text{M}$  and 400  $\mu\text{M}$  GSH respectively. The plots provided are for one independent experiment out of the three independent experiments.

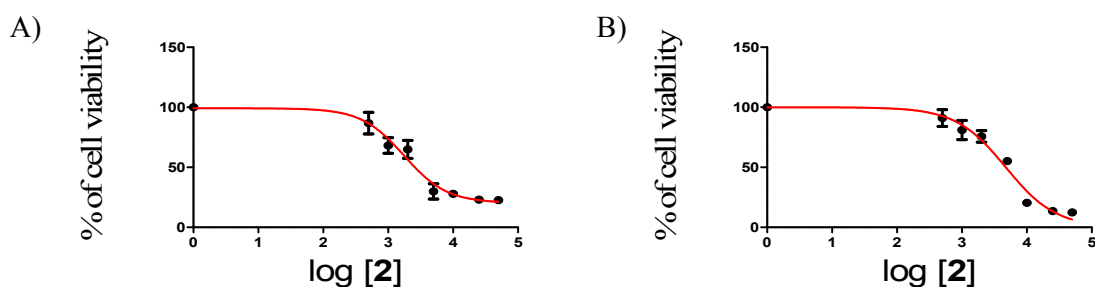

**Fig. S50** Plots of cell viability (%) vs. log of  $\mu\text{M}$  concentrations of **2** against A) MIA PaCa2 cell line after incubation for 48 h determine from MTT assays under hypoxic condition and B) MIA PaCa2 cell lines after incubation for 48 h under hypoxic condition in presence of 100  $\mu\text{M}$  GSH determined from MTT assays. The plots provided are for one independent experiment out of the three independent experiments.



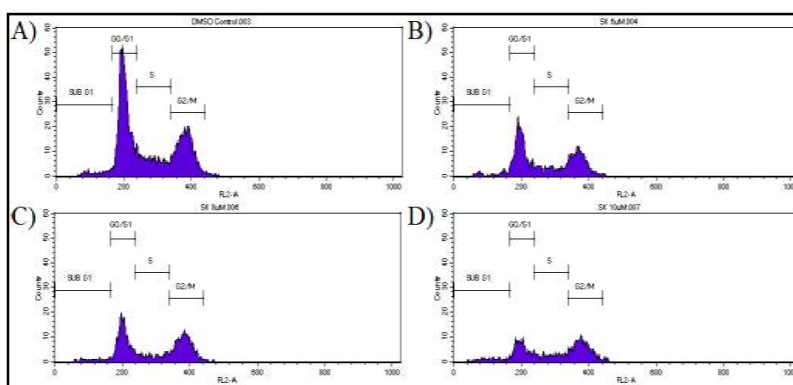

**Fig. S51** Cell cycle arrest of MCF-7 treated with **2** for 24 h. (A) DMSO control, (B) 6  $\mu$ M, (C) 8  $\mu$ M and D) 10  $\mu$ M of **2** treated cells. The figure represents one independent experiment.

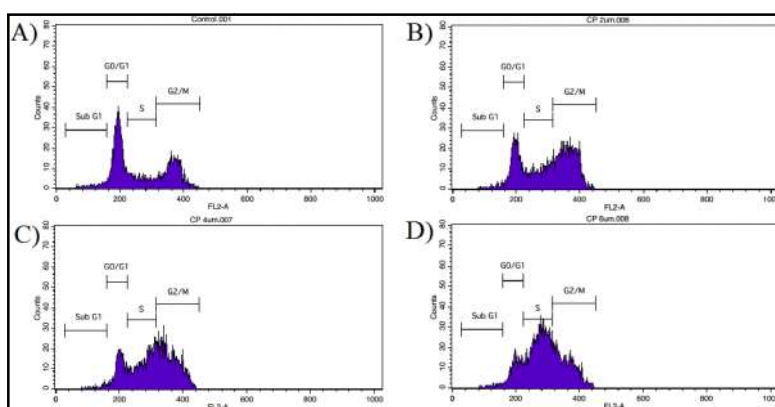

**Fig. S52** Cell cycle arrest of MCF-7 treated with cisplatin for 24 h. (A) DMSO control, (B) 2  $\mu$ M, (C) 4  $\mu$ M and D) 6  $\mu$ M of cisplatin treated cells. The figure represents one independent experiment.

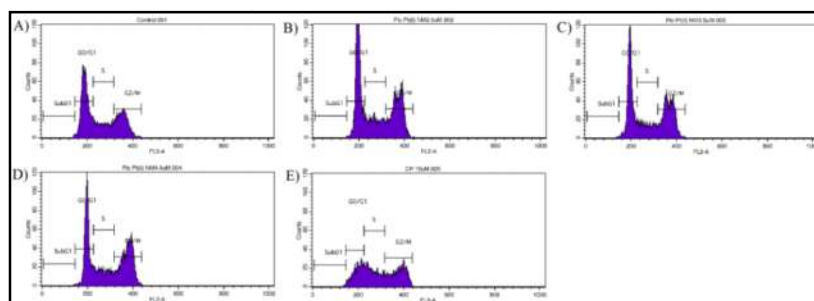

**Fig. S53** Cell cycle arrest of MIA PaCa2 treated with **2** and cisplatin respectively for 24 h. (A) DMSO control, (B) 2.5  $\mu$ M, (C) 3.5  $\mu$ M and D) 4.5  $\mu$ M of **2** and 15  $\mu$ M of cisplatin treated cells. The figure represents one independent experiment.

**Table S4** Cell cycle analysis of MCF-7 cells treated with **2**<sup>a</sup>

|                                          | Sub G1 | G0/G1 | S    | G2/M |
|------------------------------------------|--------|-------|------|------|
| DMSO control <sup>b</sup>                | 3.9    | 43.9  | 22.4 | 29.8 |
| <b>2</b> , 6 $\mu\text{M}$ <sup>b</sup>  | 5.6    | 35.4  | 20.4 | 38.6 |
| <b>2</b> , 8 $\mu\text{M}$ <sup>b</sup>  | 6.5    | 30.4  | 19.3 | 43.8 |
| <b>2</b> , 10 $\mu\text{M}$ <sup>b</sup> | 8.1    | 24.7  | 22.1 | 45.1 |

<sup>a</sup>Cells were treated with the complex for 24 h. Cell populations were expressed as the percentage of cells in each phase. <sup>b</sup>The data represents the average of two independent experiments.

**Table S5** Cell cycle analysis of MCF-7 cells treated with cisplatin<sup>a</sup>

|                                         | Sub G1 | G0/G1 | S    | G2/M |
|-----------------------------------------|--------|-------|------|------|
| DMSO control <sup>b</sup>               | 1.2    | 50.9  | 17.4 | 30.5 |
| Cisplatin, 2 $\mu\text{M}$ <sup>b</sup> | 1.2    | 24.5  | 26.6 | 47.7 |
| Cisplatin, 4 $\mu\text{M}$ <sup>b</sup> | 1.1    | 18.9  | 44.2 | 35.8 |
| Cisplatin, 6 $\mu\text{M}$ <sup>b</sup> | 1.0    | 19.2  | 58.7 | 21.1 |

<sup>a</sup>Cells were treated with the complex for 24 h. Cell populations were expressed as the percentage of cells in each phase. <sup>b</sup>The data represents the average of two independent experiments.

**Table S6** Cell cycle analysis of MIA PaCa2 cells treated with **2** and cisplatin<sup>a</sup>

|                                           | Sub G1 | G0/G1 | S    | G2/M |
|-------------------------------------------|--------|-------|------|------|
| DMSO control <sup>b</sup>                 | 1.0    | 47.6  | 21.8 | 29.6 |
| <b>2</b> , 2.5 $\mu\text{M}$ <sup>b</sup> | 1.0    | 44.3  | 19.3 | 35.4 |
| <b>2</b> , 3.5 $\mu\text{M}$ <sup>b</sup> | 1.0    | 41.2  | 18.5 | 39.3 |
| <b>2</b> , 4.5 $\mu\text{M}$ <sup>b</sup> | 1.0    | 35.9  | 20.0 | 43.1 |
| Cisplatin, 15 $\mu\text{M}$ <sup>b</sup>  | 1.0    | 27.1  | 32.9 | 39.0 |

<sup>a</sup>Cells were treated with the complex for 24 h. Cell populations were expressed as the percentage of cells in each phase. <sup>b</sup>The data represents the average of two independent experiments.
